# Supplementary material for: Non-response in a nationwide follow-up postal survey in Finland: a register-based mortality analysis of respondents and non-respondents of the Health and Social Support (HeSSup) Study
Source: PubMed Central journal article supplement — BMJ Open. 2012 Mar 15;2(2):e000657. doi: 10.1136/bmjopen-2011-000657 (PMC3307122; doi:10.1136/bmjopen-2011-000657), 2012-03-15
Supplement: bmjopen-2011-000657.draft_revisions.pdf [file bmjopen-2011-000657.draft_revisions.pdf]

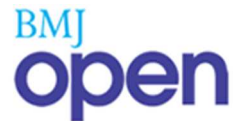

**Non-response to postal survey is related to excess mortality: A register-based analysis of the Health and Social Support (HeSSup) Cohort Study, Finland**

|                                    |                                                                                                                                                                                                                                                                                                                                                                                                                                                                                                                                                                                                                                                                                                                                                                                                           |
|------------------------------------|-----------------------------------------------------------------------------------------------------------------------------------------------------------------------------------------------------------------------------------------------------------------------------------------------------------------------------------------------------------------------------------------------------------------------------------------------------------------------------------------------------------------------------------------------------------------------------------------------------------------------------------------------------------------------------------------------------------------------------------------------------------------------------------------------------------|
| Journal:                           | <i>BMJ Open</i>                                                                                                                                                                                                                                                                                                                                                                                                                                                                                                                                                                                                                                                                                                                                                                                           |
| Manuscript ID:                     | bmjopen-2011-000657                                                                                                                                                                                                                                                                                                                                                                                                                                                                                                                                                                                                                                                                                                                                                                                       |
| Article Type:                      | Research                                                                                                                                                                                                                                                                                                                                                                                                                                                                                                                                                                                                                                                                                                                                                                                                  |
| Date Submitted by the Author:      | 25-Nov-2011                                                                                                                                                                                                                                                                                                                                                                                                                                                                                                                                                                                                                                                                                                                                                                                               |
| Complete List of Authors:          | Suominen, Sakari; University of Turku, Department of Public Health<br>Koskenvuo, Karoliina; The Social Insurance Institution of Finland,<br>Sillanmaki, Lauri; University of Helsinki, Hjelt Institute, Department of<br>Public Health<br>Vahtera, Jussi; University of Turku, Department of Public Health<br>Korkeila, Katariina; City of Raisio,<br>Kivimaki, Mika; London Medical School, Department of Epidemiology and<br>Public Health,<br>Mattila, Kari; University of Tampere, Center of General Practice<br>Virtanen, Pekka; Tampere School of Public Health, University of Tampere<br>Sumanen, Markku; University of Tampere,<br>Rautava, Paivi; University of Turku, Department of Public Health<br>Koskenvuo, Markku; University of Helsinki, Hjelt Institute, Department of<br>Public Health |
| <b>Primary Subject<br>Heading</b>: | Epidemiology                                                                                                                                                                                                                                                                                                                                                                                                                                                                                                                                                                                                                                                                                                                                                                                              |
| Secondary Subject Heading:         | Research methods                                                                                                                                                                                                                                                                                                                                                                                                                                                                                                                                                                                                                                                                                                                                                                                          |
| Keywords:                          | EPIDEMIOLOGY, PUBLIC HEALTH, SOCIAL MEDICINE                                                                                                                                                                                                                                                                                                                                                                                                                                                                                                                                                                                                                                                                                                                                                              |
|                                    |                                                                                                                                                                                                                                                                                                                                                                                                                                                                                                                                                                                                                                                                                                                                                                                                           |

SCHOLARONE™  
Manuscripts

1  
2  
3 **Non-response to postal survey is related to excess mortality: A**  
4 **register-based analysis of the Health and Social Support (HeSSup) Cohort**  
5 **Study, Finland**  
6  
7  
8  
9

10  
11  
12 Sakari Suominen contributed substantially to acquisition of data, the design of  
13 the study and to the interpretation of the data, wrote the first draft of the ms and  
14 revised it several times critically for important intellectual content. He has  
15 approved the final version of the ms.  
16  
17

18  
19  
20 Karoliina Koskenvuo contributed substantially to acquisition of data, the design of  
21 the study, carried out the first data analyses, contributed substantially to the  
22 interpretation of the data and revised the ms critically several times for important  
23 intellectual content. She has approved the final version of the ms.  
24  
25

26  
27  
28 Lauri Sillanmäki contributed substantially to acquisition of data, the design of the  
29 study, carried out data analyses, contributed substantially to the interpretation of  
30 the data and revised the ms critically several times for important intellectual  
31 content. He has approved the final version of the ms.  
32  
33

34  
35  
36 Jussi Vahtera contributed substantially to the design of the study and to the  
37 interpretation of the data and revised the ms critically several times for important  
38 intellectual content. He has approved the final version of the ms.  
39  
40

41  
42  
43 Katariina Korkeila contributed substantially to acquisition of data, the design of  
44 the study and to the interpretation of the data and revised the ms critically several  
45 times for important intellectual content. She has approved the final version of the  
46 ms.  
47  
48  
49  
50  
51  
52  
53  
54  
55  
56  
57  
58  
59  
60

1  
2  
3  
4  
5  
6  
7  
8  
9  
10  
11  
12  
13  
14  
15  
16  
17  
18  
19  
20  
21  
22  
23  
24  
25  
26  
27  
28  
29  
30  
31  
32  
33  
34  
35  
36  
37  
38  
39  
40  
41  
42  
43  
44  
45  
46  
47  
48  
49  
50  
51  
52  
53  
54  
55  
56  
57  
58  
59  
60

Mika Kivimäki contributed substantially to design of the study and to the interpretation of the data and revised the ms critically several times for important intellectual content. He has approved the final version of the ms.

Kari J. Mattila contributed substantially to acquisition of data, the design of the study and to the interpretation of the data and revised the ms critically several times for important intellectual content. He has approved the final version of the ms.

Pekka J. Virtanen contributed substantially to the interpretation of the data and revised the ms critically several times for important intellectual content. He has approved the final version of the ms.

Markku Sumanen contributed substantially to the interpretation of the data and revised the ms critically several times for important intellectual content. He has approved the final version of the ms.

Päivi Rautava contributed substantially to acquisition of data, the interpretation of the data and revised the ms critically several times for important intellectual content. She has approved the final version of the ms.

Markku Koskenvuo contributed substantially to acquisition of data, to the design of the study and to the interpretation of the data and revised the ms critically several times for important intellectual content. He has approved the final version of the ms.

## ABSTRACT

### Objective

To examine difference in mortality between postal survey respondents and non-respondents.

### Design

A prospective cohort study with baseline survey in 1998 and comprehensive linkage to national mortality registers until 2005, the Health and Social Support (HeSSup) study.

### Setting

A population based postal survey of the working aged population in Finland in 1998

### Participants

The original random sample comprised 64,797 working-aged individuals in Finland (20-24, 30-34, 40-44, 50-54 years of age; 32,059 women and 32,716 men), yielding 25,898 (40.0%) responses in the baseline postal survey in 1998.

### Primary outcome measure

Registry based primary causes of death encoded with the International Classification of Diseases (ICD-10)

### Results

In women, hazard ratio for total mortality was 1.75 (95% confidence interval 1.40 - 2.19) times higher among the non-respondents compared to the respondents. In men, non-response was associated with a 1.41 fold (1.21 - 1.65) excess risk of total mortality. Non-response associated in certain age groups with deaths due to diseases in women and with deaths due to external causes in men. The most prominent excess mortality was seen for total mortality for both genders and for mortality due to external causes among men.

### Conclusions

Postal surveys can still be considered a valid method for population based health research, but they result in slight underestimation of illness prevalence, especially illness involving mental health in men.

1  
2  
3  
4  
5  
6  
7  
8  
9  
10  
11  
12  
13  
14  
15  
16  
17  
18  
19  
20  
21  
22  
23  
24  
25  
26  
27  
28  
29  
30  
31  
32  
33  
34  
35  
36  
37  
38  
39  
40  
41  
42  
43  
44  
45  
46  
47  
48  
49  
50  
51  
52  
53  
54  
55  
56  
57  
58  
59  
60

Word Count of Abstract 220

Keywords

Follow-up Studies, Non-respondents, Mortality, Health Surveys, Registries

Article summary

Article focus

Women and individuals from upper social strata tend to participate more actively in postal health surveys

What this exactly means in terms of health selection among respondents is unclear

Postal health surveys are believed to produce underestimates of illness prevalence

Key message

Total mortality was significantly higher among non-respondents compared to respondents during a 7 year follow-up among a total Finnish nationwide sample in working age comprising almost 65 000 individuals

The excess mortality observed was moderate. Among men it was explained by external causes, whereas among women it was due to diseases and was only seen in the age group 50 – 54 years

Postal surveys can still be considered a valid method for population based health research, but they result in slight underestimation of illness prevalence, especially illness involving mental health in men

Strengths and limitations of the study

The linkage to mortality data was successful for virtually all individuals of the original sample comprising nearly 65 000 individuals. The sample size secures the reliability of the conclusions drawn. Furthermore, the registry data on mortality in Finland can be considered as reliable. To the best of the authors' knowledge a corresponding study based on a as large a sample as in this study has not previously been carried out.

1  
2  
3  
4  
5  
6  
7  
8  
9  
10  
11  
12  
13  
14  
15  
16  
17  
18  
19  
20  
21  
22  
23  
24  
25  
26  
27  
28  
29  
30  
31  
32  
33  
34  
35  
36  
37  
38  
39  
40  
41  
42  
43  
44  
45  
46  
47  
48  
49  
50  
51  
52  
53  
54  
55  
56  
57  
58  
59  
60

Inaccuracy of the final diagnosis of death is possible but nevertheless the data can be considered as reliable as registry data based on clinical work generally can become. Moreover, there is no support for the view that inaccuracy of diagnosis of death would systematically be associated with the response status of the study members.

For peer review only

## INTRODUCTION

Word count without Abstract, Tables and References 1791

Response rates in health related postal surveys are declining in the Western world. In the Nordic countries the situation has been somewhat better compared to the rest of Europe and the U.S.A., but recently even there declining trends have been observed [1, 2]. Previous studies have suggested that women, older persons and persons from upper social strata tend to participate more actively in health surveys compared with the rest [3 - 11]. However, not all studies have consistently supported these observations [10, 12, 13]. Furthermore, recent studies have extended analysis of non-response beyond demographic variables showing a lower rate of hospital admissions [2] and mortality among the respondents [14, 15].

Studies on causes for non-participation to health surveys have revealed incorrect address or incorrect delivery by post to contribute to some of the drop out [5, 8, 16]. The non-respondents themselves have reported various kinds of reasons for their behaviour, such as gaining no benefit for participation [5, 16], no interest in the topic [7, 8, 16, 17], feeling of intrusion of privacy [8], lack of time [7, 8, 17], forgetfulness [8], and present illness [17]. Surveys including questions on issues perceived as intimate have often decreased participation rates [18]. It has also been speculated that late respondents might resemble more the non-participants [5, 17, 19] but to date decisive evidence for this pattern is lacking [20]. In follow-up studies, participation has been explored according to the number of rounds

1  
2  
3 the individual has taken part in [14] and more occasions of non-response found  
4  
5 to be positively associated with subsequent mortality rates. On the whole, health  
6  
7 selection among participants might decrease the generalizability of prevalence  
8  
9 estimates but this effect is until now not satisfactorily described [21]. However,  
10  
11 even in the case of health selection the results related to the strength of  
12  
13 association between the variables studied need not necessarily be biased [21].  
14  
15  
16  
17  
18  
19

20 A non-response analysis of the postal survey of the population-based Health and  
21  
22 Social Support (HeSSup) study - which achieved a relatively modest (40 %)   
23  
24 response rate [9] - replicated previous findings on the differences in demographic  
25  
26 characteristics between respondents and non-respondents. The aim of the  
27  
28 present study was to extend these analyses to explore whether survey non-  
29  
30 respondents differ from the respondents in terms of mortality (all-cause, disease  
31  
32 mortality, mortality for external causes).  
33  
34  
35  
36  
37  
38

## 39 **MATERIALS AND METHODS**

40  
41  
42  
43 The study is based on the complete sample (N=64, 797) of the Health and Social  
44  
45 Support (HeSSup) prospective mail survey initiated in 1998. The concurrent joint  
46  
47 Ethics Committee of the University of Turku and the Turku University Central  
48  
49 Hospital considered approval not necessary for a normal cohort study, but all  
50  
51 participants were requested to sign a consent form containing information about  
52  
53 the study and to grant permission to allow subsequent studies with the same  
54  
55  
56  
57  
58  
59  
60



1  
2  
3 data set and possibility to link with national health registries. The sample  
4  
5 represented the concurrent age groups of 20-24, 30-34, 40-44 and 50-54 years  
6  
7 of age in Finland [9]. However, by purpose the Swedish speaking Finns (5% of  
8  
9 the general population) as well as the Turku region were slightly  
10  
11 overrepresented. Of the 64,797 persons, 22 could not be included in the present  
12  
13 study since the follow-up had to be set to begin from the first death among  
14  
15 respondents which was September 22<sup>nd</sup> 1998. Certain cases of deaths among  
16  
17 non respondents had occurred already earlier and potentially before sending out  
18  
19 the initial questionnaire. Totally 25,898 satisfactory responses were returned. In  
20  
21 2007, the survey material was by means of an unique social security number  
22  
23 linked to Statistics Finland data on mortality between the years 1998 and 2005.  
24  
25 Totally 1 174 cases of deaths among 25,290 observations that could be linked  
26  
27 with registry data were identified. Moreover, mortality data of non-respondents  
28  
29 from the same time period was likewise as for respondents obtained from  
30  
31 Statistics Finland and further analyzed by age group and gender.  
32  
33  
34  
35  
36  
37  
38  
39  
40

41 The outcome variable was primary causes of death encoded with the  
42  
43 International Classification of Diseases (ICD-10). Mortality for external causes  
44  
45 (S00 - Y98) and disease mortality (A00 – R99) were examined separately. The  
46  
47 differences in mortality between non-respondents and respondents were  
48  
49 analysed separately for women and men using Cox proportional hazards  
50  
51 regression. The analyses were carried out by the research group. Hazard ratios  
52  
53 (HR) with 95% confidence intervals (95% CI) for mortality (total, external causes,  
54  
55  
56  
57  
58  
59  
60

1  
2  
3 disease) of non-respondents vs. respondents according to age (1998) were  
4  
5 reported. Cox proportional hazard assumptions were tested by visual  
6  
7 examination of log-minus-log plots showing parallelism among the selected strata  
8  
9 variable (responding status). The statistical analysis was performed by the SAS  
10  
11  
12  
13 ® software 9.2. for Windows.

## 14 15 16 17 **RESULTS**

18  
19  
20  
21  
22 Between the years 1998 to 2005, 1,174 individuals belonging to the complete  
23  
24 sample died (Table 1). Of the deaths, 70% occurred in men.  
25  
26  
27  
28  
29  
30  
31  
32  
33  
34  
35  
36  
37  
38  
39  
40  
41  
42  
43  
44  
45  
46  
47  
48  
49  
50  
51  
52  
53  
54  
55  
56  
57  
58  
59  
60

Table 1. Demographics of respondents and non-respondents and number of deaths during follow-up from 1998 to 2005 (N and %).

|                                                             | Respondents |       | Non-respondents |       | Total  |       |
|-------------------------------------------------------------|-------------|-------|-----------------|-------|--------|-------|
|                                                             | N           | %     | N               | %     | N      | %     |
| <b>Gender</b>                                               |             |       |                 |       |        |       |
| Women                                                       | 14,922      | 59.0  | 17,137          | 43.4  | 32,059 | 49.5  |
| Men                                                         | 10,368      | 41.0  | 22,348          | 56.6  | 32,716 | 50.5  |
| Total                                                       | 25,290      | 100.0 | 39,485          | 100.0 | 64,775 | 100.0 |
| <b>Age in 1998</b>                                          |             |       |                 |       |        |       |
| 20-24 y                                                     | 6,783       | 26.8  | 9,405           | 23.8  | 16,188 | 25.0  |
| 30-34 y                                                     | 5,981       | 23.7  | 10,267          | 26.0  | 16,248 | 25.1  |
| 40-44 y                                                     | 6,073       | 24.0  | 10,198          | 25.8  | 16,271 | 25.1  |
| 50-54 y                                                     | 6,453       | 25.5  | 9,615           | 24.4  | 16,068 | 24.8  |
| Total                                                       | 25,290      | 100.0 | 39,485          | 100.0 | 64,775 | 100.0 |
| <b>Number of deaths by gender</b>                           | N           | %     | N               | %     | N      | %     |
| In women                                                    | 110         | 0.7   | 240             | 1.4   | 350    | 1.1   |
| In men                                                      | 218         | 2.1   | 606             | 2.7   | 824    | 2.5   |
| Total                                                       | 328         | 1.3   | 846             | 2.1   | 1,174  | 1.8   |
| <b>Number of deaths by age in 1998</b>                      |             |       |                 |       |        |       |
| 20-24 y                                                     | 21          | 0.3   | 47              | 0.5   | 68     | 0.4   |
| 30-34 y                                                     | 38          | 0.6   | 105             | 1.0   | 143    | 0.8   |
| 40-44 y                                                     | 85          | 1.4   | 252             | 2.5   | 337    | 2.1   |
| 50-54 y                                                     | 184         | 2.9   | 442             | 4.6   | 626    | 3.9   |
| Total                                                       | 328         | 1.3   | 846             | 2.1   | 1,174  | 1.8   |
| <b>Number of deaths from external causes</b>                |             |       |                 |       |        |       |
| In women                                                    | 26          | 0.2   | 48              | 0.3   | 74     | 0.2   |
| In men                                                      | 55          | 0.5   | 217             | 1.0   | 272    | 0.8   |
| Total                                                       | 81          | 0.3   | 265             | 0.7   | 346    | 0.5   |
| <b>Number of deaths from external causes by age in 1998</b> |             |       |                 |       |        |       |
| 20-24 y                                                     | 10          | <0.1  | 32              | <0.1  | 42     | <0.1  |
| 30-34 y                                                     | 16          | <0.1  | 66              | 0.2   | 82     | 0.1   |
| 40-44 y                                                     | 22          | <0.1  | 90              | 0.2   | 112    | 0.2   |
| 50-54 y                                                     | 33          | 0.1   | 77              | 0.2   | 110    | 0.2   |
| Total                                                       | 81          | 0.3   | 265             | 0.7   | 346    | 0.5   |

Table 1 continued. Demographics of respondents and non-respondents and number of deaths during follow-up from 1998 to 2005 (N and %).

|                                                 | Respondents |      | Non-respondents |      | Total |      |
|-------------------------------------------------|-------------|------|-----------------|------|-------|------|
|                                                 | N           | %    | N               | %    | N     | %    |
| Number of deaths due to diseases                |             |      |                 |      |       |      |
| In women                                        | 84          | 0.6  | 192             | 1.1  | 276   | 0.9  |
| In men                                          | 163         | 1.6  | 389             | 1.7  | 552   | 1.7  |
| Total                                           | 247         | 1.0  | 581             | 1.5  | 828   | 1.3  |
| Number of deaths due to diseases by age in 1998 |             |      |                 |      |       |      |
| 20-24 y                                         | 11          | <0.1 | 15              | <0.1 | 26    | <0.1 |
| 30-34 y                                         | 22          | <0.1 | 39              | <0.1 | 61    | <0.1 |
| 40-44 y                                         | 63          | 0.2  | 162             | 0.4  | 225   | 0.3  |
| 50-54 y                                         | 151         | 0.6  | 365             | 0.9  | 516   | 0.8  |
| Total                                           | 247         | 1.0  | 581             | 1.5  | 828   | 1.3  |

Total mortality was higher for non-respondent women in age group 50-54 years and for non-respondent men in age group 40-44 and 50-54 years and for each gender with all age groups combined. In analyses combining women and men, excess total mortality associated with non-response was observed in age groups 40-44 and 50-54 when age groups were examined separately as well as when all observations were combined (Table 2). Non-respondent men had a higher mortality for external causes in age groups 30-34 and 40-44 years and with all age groups combined. In analyses with genders combined, this was seen in age groups 30-34 and 40-44 years and when all observations were combined. In women, no statistically significant differences in mortality for external causes were detected (Table 3). Non-respondent women showed significantly higher disease-related mortality in age group 50-54 years as well as when all age groups were combined. The same held true for both genders when age groups 40-44 and 50-54 years were examined separately as well as when all

observations were combined. On the other hand, in separate analyses for men non-respondents showed a slightly increased disease mortality compared to respondents only when all age groups were combined (Table 4).

Table 2. Hazard ratios for total mortality of non-respondents vs. respondents and the 95% CIs according to gender and age at the beginning of the follow-up in 1998.

| Non-respondents vs. respondents (=1.00) | Age in 1998<br>20-24 | Age in 1998<br>30-34 | Age in 1998<br>40-44              | Age in 1998<br>50-54              | Total age or age & gender adjusted |
|-----------------------------------------|----------------------|----------------------|-----------------------------------|-----------------------------------|------------------------------------|
| Women                                   | 1.00<br>(0.34-2.97)  | 1.45<br>(0.77-2.73)  | 1.40<br>(0.93-2.10)               | <b>2.17</b><br><b>(1.58-2.98)</b> | <b>1.75</b><br><b>(1.40-2.19)</b>  |
| Men                                     | 1.28<br>(0.70-2.34)  | 1.41<br>(0.89-2.24)  | <b>1.71</b><br><b>(1.25-2.35)</b> | <b>1.31</b><br><b>(1.07-1.61)</b> | <b>1.41</b><br><b>(1.21-1.65)</b>  |
| Total gender or age & gender adjusted   | 1.21<br>(0.71-2.04)  | 1.42<br>(0.98-2.07)  | <b>1.59</b><br><b>(1.24-2.04)</b> | <b>1.54</b><br><b>(1.29-1.83)</b> | <b>1.52</b><br><b>(1.34-1.73)</b>  |

Statistically significant associations are in bold.

Table 3. Hazard ratios for deaths due to external causes in non-respondents vs. respondents and the 95% CIs according to gender and age at the beginning of the follow-up in 1998.

| Non-respondents vs. respondents (=1.00) | Age in 1998<br>20-24 | Age in 1998<br>30-34              | Age in 1998<br>40-44              | Age in 1998<br>50-54 | Total age or age & gender adjusted |
|-----------------------------------------|----------------------|-----------------------------------|-----------------------------------|----------------------|------------------------------------|
| Women                                   | 4.65<br>(0.52-41.62) | 1.94<br>(0.68-5.50)               | 1.38<br>(0.58-3.28)               | 1.18<br>(0.57-2.45)  | 1.50<br>(0.93-2.42)                |
| Men                                     | 1.36<br>(0.64-2.88)  | <b>2.04</b><br><b>(1.07-3.90)</b> | <b>2.42</b><br><b>(1.37-4.28)</b> | 1.63<br>(0.99-2.67)  | <b>1.87</b><br><b>(1.39-2.52)</b>  |
| Total gender or age & gender adjusted   | 1.61<br>(0.78-3.30)  | <b>2.01</b><br><b>(1.16-3.49)</b> | <b>2.07</b><br><b>(1.30-3.31)</b> | 1.47<br>(0.98-2.22)  | <b>1.78</b><br><b>(1.39-2.29)</b>  |

Statistically significant associations are in bold.

Table 4. Hazard ratios for disease mortality of non-respondents vs. respondents and the 95% CIs according to gender and age at the beginning of the follow-up in 1998.

| Non-respondents vs. respondents (=1.00) | Age in 1998<br>20-24 | Age in 1998<br>30-34 | Age in 1998<br>40-44              | Age in 1998<br>50-54              | Total age or age & gender adjusted |
|-----------------------------------------|----------------------|----------------------|-----------------------------------|-----------------------------------|------------------------------------|
| Women                                   | 0.39<br>(0.08-1.92)  | 1.21<br>(0.54-2.69)  | 1.41<br>(0.88-2.23)               | <b>2.46</b><br><b>(1.73-3.52)</b> | <b>1.83</b><br><b>(1.41-2.36)</b>  |
| Men                                     | 1.13<br>(0.40-3.18)  | 0.83<br>(0.42-1.66)  | 1.42<br>(0.97-2.07)               | 1.25<br>(0.99-1.56)               | <b>1.25</b><br><b>(1.04-1.50)</b>  |
| Total gender or age & gender adjusted   | 0.81<br>(0.37-1.80)  | 0.98<br>(0.58-1.67)  | <b>1.41</b><br><b>(1.05-1.89)</b> | <b>1.55</b><br><b>(1.28-1.87)</b> | <b>1.42</b><br><b>(1.23-1.65)</b>  |

Statistically significant associations are in bold.

## DISCUSSION

In this large population-based epidemiological study, comparison of mortality of non-respondents with respondents showed, as expected, a higher mortality among the former group. The differences between respondents and non-respondents, however, were not very large and of quite similar magnitude for both genders although with varying causes. Among women the greatest differences were seen in disease mortality in the oldest age group of initially 50–54 years of age. The greatest differences for men were caused by external causes of death and involved age groups 30- 34 and 40-44 years.

Postal surveys are frequently used in population based health research. The impact of health selection on the results has been studied but not very

1  
2  
3 extensively . An affirmative view on the potential demographic difference  
4  
5 between respondents and non-respondents is still lacking. According to previous  
6  
7 findings [3, 8, 9], respondents tend to be somewhat healthier and report a more  
8  
9 favourable health behaviour compared to non-respondents. However, the bias  
10  
11 caused by this was limited and applied mainly to health problems or risk  
12  
13 behaviours that generally are not eagerly communicated to others, such as  
14  
15 mental problems or binge drinking. From previous studies it is also known that  
16  
17 women as well as those well off in the society tend to participate more actively in  
18  
19 health related survey research on the whole. Hence, this might result in under-  
20  
21 estimation of the prevalence of health problems common among men as well as  
22  
23 individuals from lower social strata. Results from a previous non-response  
24  
25 analysis of the initial phase of this study supports this view [9]. Women as well as  
26  
27 individuals with high level of education were somewhat over represented among  
28  
29 respondents but no clear health-related selection could be shown. According to  
30  
31 our present results 7 years later the potential health-related selection can be  
32  
33 further clarified. In Finland, mortality for external causes is intimately associated  
34  
35 with alcohol consumption and alcoholism [22]. As could be expected, we could  
36  
37 see a significantly higher mortality for external causes among male non-  
38  
39 respondents as compared with the respondents.  
40  
41  
42  
43  
44  
45  
46  
47  
48  
49

50 Moreover, in previous studies [23] it has also been pointed out that non-  
51  
52 respondents are not necessarily a homogenic group but can differ internally, e.g.  
53  
54 depending on to which wave of the survey if any they have taken part in. Also the  
55  
56  
57  
58  
59  
60

1  
2  
3 correspondence between late respondents and total non-respondents has been  
4 questioned [20].  
5  
6  
7  
8  
9

10 Given the health selection related to postal surveys it has to be kept in mind that  
11 population studies usually do not focus solely on prevalence estimates anymore  
12 but more or less on potential risk or protective factors of certain health problems.  
13 From previous research [21] there are indications that even if prevalence  
14 estimates are not accurate the associations between the variables studies are  
15 not necessarily biased. This gives further justification to continue postal surveys  
16 in health research since the results can help us understand the etiology and  
17 prevention process of a certain kind of disease.  
18  
19  
20  
21  
22  
23  
24  
25  
26  
27  
28  
29  
30  
31

### 32 **Strengths and limitations of the study**

33  
34 A major strength of this study is that the linkage to mortality data was successful  
35 for virtually all individuals of the original sample. Furthermore, the registry data  
36 on mortality in Finland could be considered as quite reliable. All deaths with  
37 suspicion of an external cause and in the age groups studied are investigated by  
38 autopsy. Naturally, inaccuracy concerning the final diagnosis might be present  
39 but nevertheless the data can be considered as reliable as registry data based  
40 on clinical medical work generally can become. Moreover, there is no reason to  
41 assume that problems in reliability of the diagnoses would systematically be  
42 associated with the response status of the study members. The legislation in  
43  
44  
45  
46  
47  
48  
49  
50  
51  
52  
53  
54  
55  
56  
57  
58  
59  
60



1  
2  
3 Finland enables use of mortality data for research purposes and thus we were  
4  
5 able by ourselves to perform a mortality analysis for all respondents.  
6  
7  
8  
9

10 The large sample size secures that the conclusions drawn from the statistical  
11  
12 analyses are reliable and can not have been caused by random effects. To the  
13  
14 best of our knowledge a corresponding study based on as large a sample as in  
15  
16 this study has previously not been carried out.  
17  
18  
19

## 20 21 22 **Conclusions** 23 24 25

26  
27 Total mortality was moderately higher for the non-respondents of a nationwide  
28  
29 mail survey compared to the respondents in both genders. For women this was  
30  
31 mostly due to disease mortality in age group 50-54 years but for men due to  
32  
33 mortality for external causes in age groups 30-34 and 40-44 years. The most  
34  
35 prominent excess mortality was seen for total mortality for both genders and for  
36  
37 mortality due to external causes among men. Selection by health, especially  
38  
39 mental health in men can cause bias in health related population surveys.  
40  
41  
42

43 However, this applies to prevalence estimates and does not necessarily  
44  
45 jeopardize results from studies on risk and protective factors. Hence, it seems  
46  
47 justified to continue postal surveys in health research in order to improve  
48  
49 understanding of etiology and prevention of diseases.  
50  
51  
52  
53  
54  
55  
56  
57  
58  
59  
60

## REFERENCES

1. Helakorpi S., Prättälä R., Uutela A. Suomalaisen aikuisväestön terveystäyttyminen ja terveys, kevät 2007. [Health Behaviour and Health among the Finnish Adult Population. Spring 2007] Publications of the National Public Health Institute. 2008;B 6.
2. Kjølner M, Thoning H. Characteristics of non-response in the Danish Health Interview Surveys, 1987-1994. *Eur J Public Health* 2005;**15**(5):528-35 doi: 10.1093/eurpub/cki023 [Advance Access published online July 28, 2005].
3. Cottler LB, Zipp JF, Robins LN, et al. Difficult-to-recruit respondents and their effect on prevalence estimates in an epidemiologic survey. *Am J Epidemiol* 1987;**125**(2):329-39.
4. Jacobsen BK, Thelle DS. The Tromsø Heart Study: responders and non-responders to a health questionnaire, do they differ? *Scand J Soc Med* 1988;**16**(2):101-4.
5. Bakke P, Gulsvik A, Lilleng P, et al. Postal survey on airborne occupational exposure and respiratory disorders in Norway: causes and consequences of non-response. *J Epidemiol Community Health* 1990;**44**(4):316-20.
6. Jooste PL, Yach D, Steenkamp HJ, et al. Drop-out and newcomer bias in a community cardiovascular follow-up study. *Int J Epidemiol* 1990;**19**(2):284-9.

- 1  
2  
3 7. Brussaard JH, Brants HA, Bouman M, et al. The study population: general  
4 characteristics and potential confounding factors. *Eur J Clin Nutr* 1997;**51** Suppl  
5 3:S19-24.  
6  
7
- 8  
9  
10  
11 8. Rönmark E, Lundqvist A, Lundbäck B, et al. Non-responders to a postal  
12 questionnaire on respiratory symptoms and diseases. *Eur J Epidemiol*  
13 1999;**15**(3):293-9.  
14  
15  
16  
17
- 18  
19  
20 9. Korkeila K, Suominen S, Ahvenainen J, et al. Non-response and related  
21 factors in a nation-wide health survey. *Eur J Epidemiol*. 2001;**17**(11):991-9.  
22  
23  
24
- 25  
26 10. van den Akker M, Buntinx F, Metsemakers JF, et al. Morbidity in responders  
27 and non-responders in a register-based population survey. *Fam Pract*  
28 1998;**15**(3):261-3.  
29  
30  
31  
32
- 33  
34 11. Sonne-Holm S, Sørensen TI, Jensen G, et al. Influence of fatness,  
35 intelligence, education and sociodemographic factors on response rate in a  
36 health survey. *J Epidemiol Community Health* 1989;**43**(4):369-74.  
37  
38  
39
- 40  
41 12. Asch DA, Jedrzewski MK, Christakis NA. Response rates to mail surveys  
42 published in medical journals. *J Clin Epidemiol* 1997;**50**(10):1129-36.  
43  
44  
45  
46  
47
- 48  
49 13. Heilbrun LK, Ross PD, Wasnich RD, et al. Characteristics of respondents and  
50 nonrespondents in a prospective study of osteoporosis. *J Clin Epidemiol*  
51 1991;**44**(3):233-9.  
52  
53  
54  
55  
56  
57  
58  
59  
60

- 1  
2  
3 14. Ferrie JE, Kivimäki M, Singh-Manoux A, et al. Non-response to baseline,  
4 non-response to follow-up and mortality in the Whitehall II cohort. *Int J Epidemiol*  
5  
6 2009;**38**(3):831-7 doi:10.1093/ije/dyp153 [Advance Access publication 5 March  
7  
8 2009].  
9  
10  
11  
12  
13  
14 15. Mattila VM, Parkkari J, Rimpelä A. Adolescent survey non-response and later  
15 risk of death. A prospective cohort study of 78 609 persons with 11-year follow-  
16  
17 up. *BMC Public Health* 2007;**7**(1):87 doi:10.1186/1471-2458-7-87 [Published: 22  
18  
19 May 2007].  
20  
21  
22  
23  
24  
25 16. Foster K, Campbell D, Crum J, et al. Non-response in a population study  
26 after an environmental disaster. *Public Health* 1995;**109**(4):267-73.  
27  
28  
29  
30  
31 17. Janzon L, Hanson BS, Isacson SO, et al. Factors influencing participation in  
32 health surveys. Results from prospective population study 'Men born in 1914' in  
33 Malmö, Sweden. *J Epidemiol Community Health* 1986;**40**(2):174-7.  
34  
35  
36  
37  
38  
39 18. Dunne MP, Martin NG, Bailey JM, et al. Participation bias in a sexuality  
40 survey: psychological and behavioural characteristics of responders and non-  
41 responders. *Int J Epidemiol* 1997;**26**(4):844-54.  
42  
43  
44  
45  
46  
47 19. Tennant A, Badley EM. A confidence interval approach to investigating non-  
48 response bias and monitoring response to postal questionnaires. *J Epidemiol*  
49  
50  
51  
52  
53  
54  
55  
56  
57  
58  
59  
60

1  
2  
3 20. Lahaut, V. M. H. C. J., Jansen HAM, van de Mheen D, et al. Estimating non-  
4 response bias in a survey on alcohol consumption: comparison of response  
5 waves. *Alcohol Alcohol* 2003;**38**(2):128-34 [doi:10.1093/alcalc/agg044].  
6  
7

8  
9  
10  
11 21. Martikainen P, Laaksonen M, Piha K, et al. Does survey non-response bias  
12 the association between occupational social class and health? *Scand J Public*  
13 *Health* 2007;**35**(2):212-5 [doi:10.1080/14034940600996563].  
14  
15  
16

17  
18  
19 22. Koskenvuo M, Kaprio J, Kesaniemi A, et al. Alcohol-related diseases  
20 associated with ischaemic heart disease: a three-year follow-up of middle-aged  
21 male hospital patients. *Alcohol Alcohol* 1986;**21**(3):251-6.  
22  
23  
24

25  
26  
27 23. Boersma F, Eefsting JA, van den Brink W, et al. Characteristics of non-  
28 responders and the impact of non-response on prevalence estimates of  
29 dementia. *Int J Epidemiol* 1997;**26**(5):1055-62.  
30  
31  
32  
33  
34  
35  
36  
37  
38  
39  
40  
41  
42  
43  
44  
45  
46  
47  
48  
49  
50  
51  
52  
53  
54  
55  
56  
57  
58  
59  
60

1  
2  
3  
4 Acknowledgements  
5  
6  
7

8 The study was supported by the Academy of Finland (three different decisions on  
9  
10 funding)  
11

12  
13  
14 The authors do not declare any competing interests  
15  
16  
17  
18  
19  
20  
21  
22  
23  
24  
25  
26  
27  
28  
29  
30  
31  
32  
33  
34  
35  
36  
37  
38  
39  
40  
41  
42  
43  
44  
45  
46  
47  
48  
49  
50  
51  
52  
53  
54  
55  
56  
57  
58  
59  
60

For peer review only

STROBE 2007 (v4) Statement—Checklist of items that should be included in reports of *cohort studies*

| Section/Topic                | Item # | Recommendation                                                                                                                                                                       | Reported on page # |
|------------------------------|--------|--------------------------------------------------------------------------------------------------------------------------------------------------------------------------------------|--------------------|
| Title and abstract           | 1      | (a) Indicate the study's design with a commonly used term in the title or the abstract                                                                                               | 3                  |
|                              |        | (b) Provide in the abstract an informative and balanced summary of what was done and what was found                                                                                  | 3                  |
| <b>Introduction</b>          |        |                                                                                                                                                                                      |                    |
| Background/rationale         | 2      | Explain the scientific background and rationale for the investigation being reported                                                                                                 | 5                  |
| Objectives                   | 3      | State specific objectives, including any pre-specified hypotheses                                                                                                                    | 6                  |
| <b>Methods</b>               |        |                                                                                                                                                                                      |                    |
| Study design                 | 4      | Present key elements of study design early in the paper                                                                                                                              | 7-8                |
| Setting                      | 5      | Describe the setting, locations, and relevant dates, including periods of recruitment, exposure, follow-up, and data collection                                                      | 7-8                |
| Participants                 | 6      | (a) Give the eligibility criteria, and the sources and methods of selection of participants. Describe methods of follow-up                                                           | 7-8                |
|                              |        | (b) For matched studies, give matching criteria and number of exposed and unexposed                                                                                                  |                    |
| Variables                    | 7      | Clearly define all outcomes, exposures, predictors, potential confounders, and effect modifiers. Give diagnostic criteria, if applicable                                             | 8                  |
| Data sources/<br>measurement | 8*     | For each variable of interest, give sources of data and details of methods of assessment (measurement). Describe comparability of assessment methods if there is more than one group | 8                  |
| Bias                         | 9      | Describe any efforts to address potential sources of bias                                                                                                                            | 7-8                |
| Study size                   | 10     | Explain how the study size was arrived at                                                                                                                                            | 7-8                |
| Quantitative variables       | 11     | Explain how quantitative variables were handled in the analyses. If applicable, describe which groupings were chosen and why                                                         | 8                  |
| Statistical methods          | 12     | (a) Describe all statistical methods, including those used to control for confounding                                                                                                | 8-9                |
|                              |        | (b) Describe any methods used to examine subgroups and interactions                                                                                                                  | 8                  |
|                              |        | (c) Explain how missing data were addressed                                                                                                                                          | 7-8                |
|                              |        | (d) If applicable, explain how loss to follow-up was addressed                                                                                                                       | 7-8                |
|                              |        | (e) Describe any sensitivity analyses                                                                                                                                                |                    |
| <b>Results</b>               |        |                                                                                                                                                                                      |                    |

|                          |     |                                                                                                                                                                                                                |                     |
|--------------------------|-----|----------------------------------------------------------------------------------------------------------------------------------------------------------------------------------------------------------------|---------------------|
| Participants             | 13* | (a) Report numbers of individuals at each stage of study—e.g. numbers potentially eligible, examined for eligibility, confirmed eligible, included in the study, completing follow-up, and analysed            | 7-8                 |
|                          |     | (b) Give reasons for non-participation at each stage                                                                                                                                                           | 7-8                 |
|                          |     | (c) Consider use of a flow diagram                                                                                                                                                                             |                     |
| Descriptive data         | 14* | (a) Give characteristics of study participants (e.g. demographic, clinical, social) and information on exposures and potential confounders                                                                     | Table 1, 10-11      |
|                          |     | (b) Indicate number of participants with missing data for each variable of interest                                                                                                                            | Table 1, 10-11      |
|                          |     | (c) Summarise follow-up time (e.g., average and total amount)                                                                                                                                                  | 7-8, Table 1, 10-11 |
| Outcome data             | 15* | Report numbers of outcome events or summary measures over time                                                                                                                                                 | Table 1, 10-11      |
| Main results             | 16  | (a) Give unadjusted estimates and, if applicable, confounder-adjusted estimates and their precision (e.g., 95% confidence interval). Make clear which confounders were adjusted for and why they were included | Table 2-4, 12-13    |
|                          |     | (b) Report category boundaries when continuous variables were categorized                                                                                                                                      | 7-8                 |
|                          |     | (c) If relevant, consider translating estimates of relative risk into absolute risk for a meaningful time period                                                                                               |                     |
| Other analyses           | 17  | Report other analyses done—e.g. analyses of subgroups and interactions, and sensitivity analyses                                                                                                               |                     |
| <b>Discussion</b>        |     |                                                                                                                                                                                                                |                     |
| Key results              | 18  | Summarise key results with reference to study objectives                                                                                                                                                       | 13                  |
| <b>Limitations</b>       |     |                                                                                                                                                                                                                |                     |
| Interpretation           | 20  | Give a cautious overall interpretation of results considering objectives, limitations, multiplicity of analyses, results from similar studies, and other relevant evidence                                     | 13-16               |
| Generalisability         | 21  | Discuss the generalisability (external validity) of the study results                                                                                                                                          | 14-16               |
| <b>Other information</b> |     |                                                                                                                                                                                                                |                     |
| Funding                  | 22  | Give the source of funding and the role of the funders for the present study and, if applicable, for the original study on which the present article is based                                                  | 21                  |

\*Give information separately for cases and controls in case-control studies and, if applicable, for exposed and unexposed groups in cohort and cross-sectional studies.

**Note:** An Explanation and Elaboration article discusses each checklist item and gives methodological background and published examples of transparent reporting. The STROBE checklist is best used in conjunction with this article (freely available on the Web sites of PLoS Medicine at <http://www.plosmedicine.org/>, Annals of Internal Medicine at <http://www.annals.org/>, and Epidemiology at <http://www.epidem.com/>). Information on the STROBE Initiative is available at [www.strobe-statement.org](http://www.strobe-statement.org).





**Non-response in a nationwide follow-up postal survey in Finland: A register-based mortality analysis of respondents and non-respondents of the Health and Social Support (HeSSup) Study**

|                                    |                                                                                                                                                                                                                                                                                                                                                                                                                                                                                                                                                                                                                                                                                                                                                                                                           |
|------------------------------------|-----------------------------------------------------------------------------------------------------------------------------------------------------------------------------------------------------------------------------------------------------------------------------------------------------------------------------------------------------------------------------------------------------------------------------------------------------------------------------------------------------------------------------------------------------------------------------------------------------------------------------------------------------------------------------------------------------------------------------------------------------------------------------------------------------------|
| Journal:                           | <i>BMJ Open</i>                                                                                                                                                                                                                                                                                                                                                                                                                                                                                                                                                                                                                                                                                                                                                                                           |
| Manuscript ID:                     | bmjopen-2011-000657.R1                                                                                                                                                                                                                                                                                                                                                                                                                                                                                                                                                                                                                                                                                                                                                                                    |
| Article Type:                      | Research                                                                                                                                                                                                                                                                                                                                                                                                                                                                                                                                                                                                                                                                                                                                                                                                  |
| Date Submitted by the Author:      | 09-Jan-2012                                                                                                                                                                                                                                                                                                                                                                                                                                                                                                                                                                                                                                                                                                                                                                                               |
| Complete List of Authors:          | Suominen, Sakari; University of Turku, Department of Public Health<br>Koskenvuo, Karoliina; The Social Insurance Institution of Finland,<br>Sillanmaki, Lauri; University of Helsinki, Hjelt Institute, Department of<br>Public Health<br>Vahtera, Jussi; University of Turku, Department of Public Health<br>Korkeila, Katariina; City of Raisio,<br>Kivimaki, Mika; London Medical School, Department of Epidemiology and<br>Public Health,<br>Mattila, Kari; University of Tampere, Center of General Practice<br>Virtanen, Pekka; Tampere School of Public Health, University of Tampere<br>Sumanen, Markku; University of Tampere,<br>Rautava, Paivi; University of Turku, Department of Public Health<br>Koskenvuo, Markku; University of Helsinki, Hjelt Institute, Department of<br>Public Health |
| <b>Primary Subject<br>Heading</b>: | Epidemiology                                                                                                                                                                                                                                                                                                                                                                                                                                                                                                                                                                                                                                                                                                                                                                                              |
| Secondary Subject Heading:         | Research methods                                                                                                                                                                                                                                                                                                                                                                                                                                                                                                                                                                                                                                                                                                                                                                                          |
| Keywords:                          | EPIDEMIOLOGY, PUBLIC HEALTH, SOCIAL MEDICINE                                                                                                                                                                                                                                                                                                                                                                                                                                                                                                                                                                                                                                                                                                                                                              |
|                                    |                                                                                                                                                                                                                                                                                                                                                                                                                                                                                                                                                                                                                                                                                                                                                                                                           |

1  
2  
3  
4  
5  
6  
7  
8  
9  
10  
11  
12  
13  
14  
15  
16  
17  
18  
19  
20  
21  
22  
23  
24  
25  
26  
27  
28  
29  
30  
31  
32  
33  
34  
35  
36  
37  
38  
39  
40  
41  
42  
43  
44  
45  
46  
47  
48  
49  
50  
51  
52  
53  
54  
55  
56  
57  
58  
59  
60

**Non-response in a nationwide follow-up postal survey in Finland: A register-based mortality analysis of respondents and non-respondents of the Health and Social Support (HeSSup) Study.**

**All authors critically revised the paper for important intellectual content and approved the final version.**

**Deleted: Non-response to postal survey is related to excess mortality: A register-based analysis of the Health and Social Support (HeSSup) Cohort Study, Finland ¶**

**Deleted:** Sakari Suominen contributed substantially to acquisition of data, the design of the study and to the interpretation of the data, wrote the first draft of the ms and revised it several times critically for important intellectual content. He has approved the final version of the ms.¶

Karoliina Koskenvuo contributed substantially to acquisition of data, the design of the study, carried out the first data analyses, contributed substantially to the interpretation of the data and revised the ms critically several times for important intellectual content. She has approved the final version of the ms.¶

Lauri Sillanmäki contributed substantially to acquisition of data, the design of the study, carried out data analyses, contributed substantially to the interpretation of the data and revised the ms critically several times for important intellectual content. He has approved the final version of the ms.¶

Jussi Vahtera contributed substantially to the design of the study and to the interpretation of the data and revised the ms critically several times for important intellectual content. He has approved the final version of the ms.¶

Katariina Korkeila contributed substantially to acquisition of data, the design of the study and to the interpretation of the data and revised the ms critically several times for important intellectual content. She has approved the final version of the ms.¶

Mika Kivimäki contributed substantially to design of the study and to the interpretation of the data and revised the ms critically several times for important intellectual content. He has approved the final version of the ms.¶

Kari J. Mattila contributed substantially to acquisition of data, the design of the study and to the interpretation of the data and revised the ms critically several times for important intellectual content. He has approved the final version of the ms.¶

Pekka J. Virtanen contributed substantially to the interpretation of the data and revised the ms critically several times for important intellectual content. He has approved the final version of the ms.¶

Markku Sumanen contributed substantially to the interpretation of the data and revised the ms critically several times for important intellectual content. He has approved the final version of the ms.¶

Päivi Rautava contributed substantially to acquisition of data, the interpretation of the data and revised the ms critically several times for important intellectual content. She has approved the final version of the ms.¶

Markku Koskenvuo contributed substantially to acquisition of data, to the design of the study and to the interpretation of the data and revised the ms critically several times for important intellectual content. He has approved the final version of the ms.¶

## ABSTRACT

### Objective

To examine difference in mortality between postal survey non-respondents and respondents.

Deleted: non-

### Design

A prospective cohort study with baseline survey in 1998 and comprehensive linkage to national mortality registers until 2005, the Health and Social Support (HeSSup) study.

### Setting

A population based postal survey of the working aged population in Finland in 1998

### Participants

The original random sample comprised 64,797 working-aged individuals in Finland (20-24, 30-34, 40-44, 50-54 years of age; 32,059 women and 32,716 men), yielding 25,898 (40.0%) responses in the baseline postal survey in 1998.

### Primary outcome measure

Registry based primary causes of death encoded with the International Classification of Diseases (ICD-10)

### Results

In women, hazard ratio for total mortality was 1.75 (95% confidence interval 1.40 - 2.19) times higher among the non-respondents compared to the respondents.

In men, non-response was associated with a 1.41 fold (1.21 - 1.65) excess risk of total mortality. Non-response associated in certain age groups with deaths due to diseases in women and with deaths due to external causes in men. The most prominent excess mortality was seen for total mortality for both genders and for mortality due to external causes among men.

### Conclusions

Postal surveys result in slight underestimation of illness prevalence, especially illness involving mental health in men.

Deleted: can still be considered a valid method for population based health research, but they

Word Count of Abstract 207,

Deleted: 20

Keywords

Follow-up Studies, Non-respondents, Mortality, Health Surveys, Registries

Article summary

Article focus

Women and individuals from upper social strata tend to participate more actively in postal health surveys

What this exactly means in terms of health selection among respondents is unclear

Postal health surveys are believed to produce underestimates of illness prevalence

Key message

Total mortality was consistently and for women in the age group  $\geq 50$  years and for men in the age groups  $\geq 40$  years significantly higher among non-respondents compared to respondents during a 7 year follow-up among a total Finnish nationwide sample in working age comprising almost 65 000 individuals

The excess mortality observed was 1.5 – 2 fold. Among men it was explained by external causes, whereas among women it was due to diseases and was statistically significant only in the age group 50 – 54 years

Deleted: moderate

Deleted: only seen

Postal surveys result in slight underestimation of illness prevalence, especially illness involving mental health in men

Deleted: can still be considered a valid method for population based health research, but they

Strengths and limitations of the study

The linkage to mortality data was successful for virtually all individuals of the original sample comprising nearly 65 000 individuals. The sample size secures the reliability of the conclusions drawn. Furthermore, the registry data on mortality in Finland can be considered as reliable. To the best of the authors' knowledge a corresponding study based on a as large a sample as in this study has not previously been carried out.

1  
2  
3  
4  
5  
6  
7  
8  
9  
10  
11  
12  
13  
14  
15  
16  
17  
18  
19  
20  
21  
22  
23  
24  
25  
26  
27  
28  
29  
30  
31  
32  
33  
34  
35  
36  
37  
38  
39  
40  
41  
42  
43  
44  
45  
46  
47  
48  
49  
50  
51  
52  
53  
54  
55  
56  
57  
58  
59  
60

Some inaccuracy concerning the final diagnosis of death is possible. A further study limitation is that data of socioeconomic status or educational level of non-respondents was not available and hence adjustments of the statistical analyses for these variables was not possible.

**Deleted:** Inaccuracy of the final diagnosis of death is possible but nevertheless the data can be considered as reliable as registry data based on clinical work generally can become. Moreover, there is no support for the view that inaccuracy of diagnosis of death would systematically be associated with the response status of the study members.¶

For peer review only

## INTRODUCTION

Word count without Abstract, Tables and References 1703

Deleted: 91

Response rates in health related postal surveys are declining in the Western world. In the Nordic countries the situation has been somewhat better compared to the rest of Europe and the U.S.A., but recently even there declining trends have been observed [1, 2]. Previous studies have suggested that women, older persons and persons from upper social strata tend to participate more actively in health surveys compared with the rest [3 - 11] However, not all studies have consistently supported these observations [10, 12, 13]. Furthermore, recent studies have extended analysis of non-response beyond demographic variables showing lower rate of hospital admissions [2], mortality and maternal smoking during pregnancy among the participants as compared to non-participants [14, 15].

Deleted: a

Deleted: and

Deleted: responden

Studies on causes for non-participation to health surveys have revealed incorrect address or incorrect delivery by post to contribute to some of the drop out [5, 8, 16]. The non-respondents themselves have reported various kinds of reasons for their behaviour, such as gaining no benefit for participation [5, 16], no interest in the topic [7, 8, 16, 17], feeling of intrusion of privacy [8], lack of time [7, 8, 17], forgetfulness [8], and present illness [17]. Surveys including questions on issues perceived as intimate have often decreased participation rates [18]. It has also been speculated that late respondents might resemble more the non-participants [5, 17, 19] but to date decisive evidence for this pattern is lacking [20]. In follow-

1  
2  
3  
4  
5  
6  
7  
8 up studies, participation has been explored according to the number of rounds  
9 the individual has taken part in [14] and more occasions of non-response found  
10 to be positively associated with subsequent mortality rates. On the whole, health  
11 selection among participants might decrease the generalizability of prevalence  
12 estimates but this effect is until now not satisfactorily described [21]. However,  
13 even in the case of health selection the results related to the strength of  
14 association between the variables studied need not necessarily be biased [15,  
15 21].  
16  
17  
18  
19  
20  
21  
22  
23  
24

25 A non-response analysis of the postal survey of the population-based Health and  
26 Social Support (HeSSup) study - which achieved a relatively modest (40 %)  
27 response rate [9] - replicated previous findings on the differences in demographic  
28 characteristics between respondents and non-respondents. The aim of the  
29 present study was to extend these analyses to explore whether survey non-  
30 respondents differ from the respondents in terms of mortality (all-cause, disease  
31 mortality, mortality for external causes).  
32  
33  
34  
35  
36  
37  
38  
39  
40

## 41 **MATERIALS AND METHODS**

42  
43  
44  
45 The study is based on the complete sample (N=64, 797) of the Health and Social  
46 Support (HeSSup) prospective mail survey initiated in 1998. The concurrent joint  
47 Ethics Committee of the University of Turku and the Turku University Central  
48 Hospital considered approval not necessary for a normal cohort study, but all  
49  
50  
51  
52  
53  
54  
55  
56  
57  
58  
59  
60

1  
2  
3  
4  
5  
6  
7  
8 participants were requested to sign a consent form containing information about  
9 the study and to grant permission to allow subsequent studies with the same  
10 data set and possibility to link with national health registries. The sample  
11 represented the concurrent age groups of 20-24, 30-34, 40-44 and 50-54 years  
12 of age in Finland [9]. However, by purpose the Swedish speaking Finns (5% of  
13 the general population) as well as the Turku region were slightly  
14 overrepresented. Of the 64,797 persons, 22 could not be included in the present  
15 study since the follow-up had to be set to begin from the first death among  
16 respondents which was September 22<sup>nd</sup> 1998. Certain cases of deaths among  
17 non-respondents had occurred already earlier and potentially before sending out  
18 the initial questionnaire. Totally 25,898 satisfactory responses were returned. In  
19 2007, the survey material was by means of an unique social security number  
20 linked to Statistics Finland data on mortality between the years 1998 and 2005.  
21  
22  
23  
24  
25  
26  
27  
28  
29  
30  
31  
32  
33  
34  
35  
36  
37  
38  
39  
40  
41  
42  
43  
44  
45  
46  
47  
48  
49  
50  
51  
52  
53  
54  
55  
56  
57  
58  
59  
60

Totally 1,174 cases of deaths among 25,290 observations that could be linked with registry data were identified. Moreover, mortality data of non-respondents from the same time period was likewise as for respondents obtained from Statistics Finland and further analyzed by age group and gender.

Deleted:

Deleted:



1  
2  
3  
4  
5  
6  
7  
8 regression. The analyses were carried out by the research group. Hazard ratios  
9 (HR) with 95% confidence intervals (95% CI) for mortality (total, external causes,  
10 disease) of non-respondents vs. respondents according to age (1998) were  
11 reported. Cox proportional hazard assumptions were tested by visual  
12 examination of log-minus-log plots showing parallelism among the selected strata  
13 variable (responding status). The statistical analysis was performed by the SAS  
14  
15  
16  
17  
18  
19  
20  
21  
22  
23  
24  
25  
26  
27  
28  
29  
30  
31  
32  
33  
34  
35  
36  
37  
38  
39  
40  
41  
42  
43  
44  
45  
46  
47  
48  
49  
50  
51  
52  
53  
54  
55  
56  
57  
58  
59  
60

® software 9.2. for Windows.

## RESULTS

Between the years 1998 to 2005, 1,174 individuals belonging to the complete sample died (Table 1). Of the deaths, 70% occurred in men.

Table 1. Demographics of respondents and non-respondents and number of deaths during follow-up from 1998 to 2005 (N and %).

|                                                      | Respondents |       | Non-respondents |       | Total  |       |
|------------------------------------------------------|-------------|-------|-----------------|-------|--------|-------|
|                                                      | N           | %     | N               | %     | N      | %     |
| Gender                                               |             |       |                 |       |        |       |
| Women                                                | 14,922      | 59.0  | 17,137          | 43.4  | 32,059 | 49.5  |
| Men                                                  | 10,368      | 41.0  | 22,348          | 56.6  | 32,716 | 50.5  |
| Total                                                | 25,290      | 100.0 | 39,485          | 100.0 | 64,775 | 100.0 |
| Age in 1998                                          |             |       |                 |       |        |       |
| 20-24 y                                              | 6,783       | 26.8  | 9,405           | 23.8  | 16,188 | 25.0  |
| 30-34 y                                              | 5,981       | 23.7  | 10,267          | 26.0  | 16,248 | 25.1  |
| 40-44 y                                              | 6,073       | 24.0  | 10,198          | 25.8  | 16,271 | 25.1  |
| 50-54 y                                              | 6,453       | 25.5  | 9,615           | 24.4  | 16,068 | 24.8  |
| Total                                                | 25,290      | 100.0 | 39,485          | 100.0 | 64,775 | 100.0 |
| Number of deaths by gender                           | N           | %     | N               | %     | N      | %     |
| In women                                             | 110         | 0.7   | 240             | 1.4   | 350    | 1.1   |
| In men                                               | 218         | 2.1   | 606             | 2.7   | 824    | 2.5   |
| Total                                                | 328         | 1.3   | 846             | 2.1   | 1,174  | 1.8   |
| Number of deaths by age in 1998                      |             |       |                 |       |        |       |
| 20-24 y                                              | 21          | 0.3   | 47              | 0.5   | 68     | 0.4   |
| 30-34 y                                              | 38          | 0.6   | 105             | 1.0   | 143    | 0.8   |
| 40-44 y                                              | 85          | 1.4   | 252             | 2.5   | 337    | 2.1   |
| 50-54 y                                              | 184         | 2.9   | 442             | 4.6   | 626    | 3.9   |
| Total                                                | 328         | 1.3   | 846             | 2.1   | 1,174  | 1.8   |
| Number of deaths from external causes                |             |       |                 |       |        |       |
| In women                                             | 26          | 0.2   | 48              | 0.3   | 74     | 0.2   |
| In men                                               | 55          | 0.5   | 217             | 1.0   | 272    | 0.8   |
| Total                                                | 81          | 0.3   | 265             | 0.7   | 346    | 0.5   |
| Number of deaths from external causes by age in 1998 |             |       |                 |       |        |       |
| 20-24 y                                              | 10          | <0.1  | 32              | <0.1  | 42     | <0.1  |
| 30-34 y                                              | 16          | <0.1  | 66              | 0.2   | 82     | 0.1   |
| 40-44 y                                              | 22          | <0.1  | 90              | 0.2   | 112    | 0.2   |
| 50-54 y                                              | 33          | 0.1   | 77              | 0.2   | 110    | 0.2   |
| Total                                                | 81          | 0.3   | 265             | 0.7   | 346    | 0.5   |

Table 1 continued. Demographics of respondents and non-respondents and number of deaths during follow-up from 1998 to 2005 (N and %).

|                                                 | Respondents |      | Non-respondents |      | Total |      |
|-------------------------------------------------|-------------|------|-----------------|------|-------|------|
|                                                 | N           | %    | N               | %    | N     | %    |
| Number of deaths due to diseases                |             |      |                 |      |       |      |
| In women                                        | 84          | 0.6  | 192             | 1.1  | 276   | 0.9  |
| In men                                          | 163         | 1.6  | 389             | 1.7  | 552   | 1.7  |
| Total                                           | 247         | 1.0  | 581             | 1.5  | 828   | 1.3  |
| Number of deaths due to diseases by age in 1998 |             |      |                 |      |       |      |
| 20-24 y                                         | 11          | <0.1 | 15              | <0.1 | 26    | <0.1 |
| 30-34 y                                         | 22          | <0.1 | 39              | <0.1 | 61    | <0.1 |
| 40-44 y                                         | 63          | 0.2  | 162             | 0.4  | 225   | 0.3  |
| 50-54 y                                         | 151         | 0.6  | 365             | 0.9  | 516   | 0.8  |
| Total                                           | 247         | 1.0  | 581             | 1.5  | 828   | 1.3  |

Total mortality was higher for non-respondent women in age group 50-54 years and for non-respondent men in age group 40-44 and 50-54 years and for each gender with all age groups combined. In analyses combining women and men, excess total mortality associated with non-response was observed in age groups 40-44 and 50-54 when age groups were examined separately as well as when all observations were combined (Table 2). Non-respondent men had a higher mortality for external causes in age groups 30-34 and 40-44 years and with all age groups combined. In analyses with genders combined, this was seen in age groups 30-34 and 40-44 years and when all observations were combined. In women, no statistically significant differences in mortality for external causes were detected (Table 3). Non-respondent women showed significantly higher disease-related mortality in age group 50-54 years as well as when all age groups were combined. The same held true for both genders when age groups 40-44 and 50-54 years were examined separately as well as when all

observations were combined. On the other hand, in separate analyses for men non-respondents showed a slightly increased disease mortality compared to respondents only when all age groups were combined (Table 4).

Table 2. Hazard ratios for total mortality of non-respondents vs. respondents and the 95% CIs according to gender and age at the beginning of the follow-up in 1998.

| Non-respondents vs. respondents (=1.00) | Age in 1998 20-24   | Age in 1998 30-34   | Age in 1998 40-44                 | Age in 1998 50-54                 | Total age or age & gender adjusted |
|-----------------------------------------|---------------------|---------------------|-----------------------------------|-----------------------------------|------------------------------------|
| Women                                   | 1.00<br>(0.34-2.97) | 1.45<br>(0.77-2.73) | 1.40<br>(0.93-2.10)               | <b>2.17</b><br><b>(1.58-2.98)</b> | <b>1.75</b><br><b>(1.40-2.19)</b>  |
| Men                                     | 1.28<br>(0.70-2.34) | 1.41<br>(0.89-2.24) | <b>1.71</b><br><b>(1.25-2.35)</b> | <b>1.31</b><br><b>(1.07-1.61)</b> | <b>1.41</b><br><b>(1.21-1.65)</b>  |
| Total gender or age & gender adjusted   | 1.21<br>(0.71-2.04) | 1.42<br>(0.98-2.07) | <b>1.59</b><br><b>(1.24-2.04)</b> | <b>1.54</b><br><b>(1.29-1.83)</b> | <b>1.52</b><br><b>(1.34-1.73)</b>  |

Statistically significant associations are in bold.

Table 3. Hazard ratios for deaths due to external causes in non-respondents vs. respondents and the 95% CIs according to gender and age at the beginning of the follow-up in 1998.

| Non-respondents vs. respondents (=1.00) | Age in 1998 20-24    | Age in 1998 30-34                 | Age in 1998 40-44                 | Age in 1998 50-54   | Total age or age & gender adjusted |
|-----------------------------------------|----------------------|-----------------------------------|-----------------------------------|---------------------|------------------------------------|
| Women                                   | 4.65<br>(0.52-41.62) | 1.94<br>(0.68-5.49)               | 1.38<br>(0.58-3.28)               | 1.18<br>(0.57-2.45) | 1.50<br>(0.93-2.42)                |
| Men                                     | 1.36<br>(0.64-2.88)  | <b>2.04</b><br><b>(1.07-3.90)</b> | <b>2.42</b><br><b>(1.37-4.28)</b> | 1.62<br>(0.99-2.67) | <b>1.87</b><br><b>(1.39-2.52)</b>  |
| Total gender or age & gender adjusted   | 1.61<br>(0.78-3.30)  | <b>2.01</b><br><b>(1.16-3.49)</b> | <b>2.07</b><br><b>(1.30-3.31)</b> | 1.47<br>(0.98-2.22) | <b>1.78</b><br><b>(1.39-2.29)</b>  |

Statistically significant associations are in bold.

Table 4. Hazard ratios for disease mortality of non-respondents vs. respondents and the 95% CIs according to gender and age at the beginning of the follow-up in 1998.

| Non-respondents vs. respondents (=1.00) | Age in 1998 20-24   | Age in 1998 30-34   | Age in 1998 40-44                 | Age in 1998 50-54                 | Total age or age & gender adjusted |
|-----------------------------------------|---------------------|---------------------|-----------------------------------|-----------------------------------|------------------------------------|
| Women                                   | 0.39<br>(0.08-1.92) | 1.21<br>(0.54-2.69) | 1.41<br>(0.88-2.23)               | <b>2.46</b><br><b>(1.73-3.52)</b> | <b>1.83</b><br><b>(1.41-2.36)</b>  |
| Men                                     | 1.13<br>(0.40-3.18) | 0.83<br>(0.42-1.66) | 1.43<br>(0.98-2.09)               | 1.25<br>(1.00-1.57)               | <b>1.25</b><br><b>(1.04-1.51)</b>  |
| Total gender or age & gender adjusted   | 0.81<br>(0.37-1.80) | 0.98<br>(0.58-1.67) | <b>1.42</b><br><b>(1.06-1.90)</b> | <b>1.55</b><br><b>(1.28-1.88)</b> | <b>1.43</b><br><b>(1.23-1.66)</b>  |

Statistically significant associations are in bold.

## DISCUSSION

In this large population-based epidemiological study, comparison of mortality of non-respondents with respondents showed, as expected, consistently higher mortality rates among the former group. The differences between non-respondents and respondents were 1.5 – 2 fold and of quite similar magnitude for both genders although with varying causes. Among women the greatest statistically significant differences were seen in disease mortality in the oldest age group of initially 50–54 years of age. The greatest significant differences for men were caused by external causes of death and involved age groups 30- 34 and 40-44 years.

- Deleted: 2
- Formatted: English (U.S.)
- Formatted: English (U.S.)
- Deleted: 7
- Deleted: 7
- Deleted: 0.99
- Deleted: 6
- Formatted: English (U.S.)
- Deleted: 0
- Formatted: English (U.S.)
- Deleted: 1
- Formatted: English (U.S.)
- Deleted: 2
- Formatted: English (U.S.)
- Deleted: 5
- Formatted: English (U.S.)
- Deleted: 89
- Formatted: English (U.S.)
- Deleted: 7
- Formatted: English (U.S.)
- Deleted: 5
- Deleted: a
- Deleted: non-
- Deleted: , however,
- Deleted: not very large

1  
2  
3  
4  
5  
6  
7  
8 Postal surveys are frequently used in population based health research. The  
9 impact of health selection on the results has been studied but not very  
10 extensively. An affirmative view on the potential demographic difference between  
11 respondents and non-respondents is still lacking. According to previous findings  
12 [3, 8, 9], respondents tend to be somewhat healthier and report a more  
13 favourable health behaviour compared to non-respondents. However, the bias  
14 caused by this was limited and applied mainly to health problems or risk  
15 behaviours that generally are not eagerly communicated to others, such as  
16 mental problems or binge drinking. From previous studies it is also known that  
17 women as well as those well off in the society tend to participate more actively in  
18 health related survey research on the whole. Hence, this might result in under-  
19 estimation of the prevalence of health problems common among men as well as  
20 individuals from lower social strata. Results from a previous non-response  
21 analysis of the initial phase of this study supports this view [9]. Women as well as  
22 individuals with high level of education were somewhat over represented among  
23 respondents but no clear health-related selection could be shown. According to  
24 our present results 7 years later the potential health-related selection can be  
25 further clarified. In Finland, mortality for external causes is intimately associated  
26 with alcohol consumption and alcoholism [22]. As could be expected, we could  
27 see a significantly higher mortality for external causes among male non-  
28 respondents as compared with the respondents.  
29  
30  
31  
32  
33  
34  
35  
36  
37  
38  
39  
40  
41  
42  
43  
44  
45  
46  
47  
48  
49  
50  
51  
52  
53  
54  
55  
56  
57  
58  
59  
60

Deleted:

1  
2  
3  
4  
5  
6  
7  
8 Moreover, in previous studies [23] it has also been pointed out that non-  
9 respondents are not necessarily a homogenic group but can differ internally, e.g.  
10 depending on to which wave of the survey if any they have taken part in. Also the  
11 correspondence between late respondents and total non-respondents has been  
12 questioned [20].  
13  
14  
15  
16  
17  
18

19  
20 Given the health selection related to postal surveys it has to be kept in mind that  
21 population studies usually do not focus solely on prevalence estimates anymore  
22 but more or less on potential risk or protective factors of certain health problems.  
23  
24 From previous research [21] there are indications that even if prevalence  
25 estimates are not accurate the associations between the variables studies are  
26 not necessarily biased.  
27  
28  
29  
30  
31  
32

### 33 **Strengths and limitations of the study**

34  
35 A major strength of this study is that the linkage to mortality data was successful  
36 for virtually all individuals of the original sample. Furthermore, the registry data  
37 on mortality in Finland could be considered as quite reliable. All deaths with  
38 suspicion of an external cause and in the age groups studied are investigated by  
39  
40  
41  
42  
43  
44  
45  
46  
47  
48  
49  
50  
51  
52  
53  
54  
55  
56  
57  
58  
59  
60

53  
54  
55  
56  
57  
58  
59  
60  
61  
62  
63  
64  
65  
66  
67  
68  
69  
70  
71  
72  
73  
74  
75  
76  
77  
78  
79  
80  
81  
82  
83  
84  
85  
86  
87  
88  
89  
90  
91  
92  
93  
94  
95  
96  
97  
98  
99  
100  
101  
102  
103  
104  
105  
106  
107  
108  
109  
110  
111  
112  
113  
114  
115  
116  
117  
118  
119  
120  
121  
122  
123  
124  
125  
126  
127  
128  
129  
130  
131  
132  
133  
134  
135  
136  
137  
138  
139  
140  
141  
142  
143  
144  
145  
146  
147  
148  
149  
150  
151  
152  
153  
154  
155  
156  
157  
158  
159  
160  
161  
162  
163  
164  
165  
166  
167  
168  
169  
170  
171  
172  
173  
174  
175  
176  
177  
178  
179  
180  
181  
182  
183  
184  
185  
186  
187  
188  
189  
190  
191  
192  
193  
194  
195  
196  
197  
198  
199  
200  
201  
202  
203  
204  
205  
206  
207  
208  
209  
210  
211  
212  
213  
214  
215  
216  
217  
218  
219  
220  
221  
222  
223  
224  
225  
226  
227  
228  
229  
230  
231  
232  
233  
234  
235  
236  
237  
238  
239  
240  
241  
242  
243  
244  
245  
246  
247  
248  
249  
250  
251  
252  
253  
254  
255  
256  
257  
258  
259  
260  
261  
262  
263  
264  
265  
266  
267  
268  
269  
270  
271  
272  
273  
274  
275  
276  
277  
278  
279  
280  
281  
282  
283  
284  
285  
286  
287  
288  
289  
290  
291  
292  
293  
294  
295  
296  
297  
298  
299  
300  
301  
302  
303  
304  
305  
306  
307  
308  
309  
310  
311  
312  
313  
314  
315  
316  
317  
318  
319  
320  
321  
322  
323  
324  
325  
326  
327  
328  
329  
330  
331  
332  
333  
334  
335  
336  
337  
338  
339  
340  
341  
342  
343  
344  
345  
346  
347  
348  
349  
350  
351  
352  
353  
354  
355  
356  
357  
358  
359  
360  
361  
362  
363  
364  
365  
366  
367  
368  
369  
370  
371  
372  
373  
374  
375  
376  
377  
378  
379  
380  
381  
382  
383  
384  
385  
386  
387  
388  
389  
390  
391  
392  
393  
394  
395  
396  
397  
398  
399  
400  
401  
402  
403  
404  
405  
406  
407  
408  
409  
410  
411  
412  
413  
414  
415  
416  
417  
418  
419  
420  
421  
422  
423  
424  
425  
426  
427  
428  
429  
430  
431  
432  
433  
434  
435  
436  
437  
438  
439  
440  
441  
442  
443  
444  
445  
446  
447  
448  
449  
450  
451  
452  
453  
454  
455  
456  
457  
458  
459  
460  
461  
462  
463  
464  
465  
466  
467  
468  
469  
470  
471  
472  
473  
474  
475  
476  
477  
478  
479  
480  
481  
482  
483  
484  
485  
486  
487  
488  
489  
490  
491  
492  
493  
494  
495  
496  
497  
498  
499  
500  
501  
502  
503  
504  
505  
506  
507  
508  
509  
510  
511  
512  
513  
514  
515  
516  
517  
518  
519  
520  
521  
522  
523  
524  
525  
526  
527  
528  
529  
530  
531  
532  
533  
534  
535  
536  
537  
538  
539  
540  
541  
542  
543  
544  
545  
546  
547  
548  
549  
550  
551  
552  
553  
554  
555  
556  
557  
558  
559  
560  
561  
562  
563  
564  
565  
566  
567  
568  
569  
570  
571  
572  
573  
574  
575  
576  
577  
578  
579  
580  
581  
582  
583  
584  
585  
586  
587  
588  
589  
590  
591  
592  
593  
594  
595  
596  
597  
598  
599  
600  
601  
602  
603  
604  
605  
606  
607  
608  
609  
610  
611  
612  
613  
614  
615  
616  
617  
618  
619  
620  
621  
622  
623  
624  
625  
626  
627  
628  
629  
630  
631  
632  
633  
634  
635  
636  
637  
638  
639  
640  
641  
642  
643  
644  
645  
646  
647  
648  
649  
650  
651  
652  
653  
654  
655  
656  
657  
658  
659  
660  
661  
662  
663  
664  
665  
666  
667  
668  
669  
670  
671  
672  
673  
674  
675  
676  
677  
678  
679  
680  
681  
682  
683  
684  
685  
686  
687  
688  
689  
690  
691  
692  
693  
694  
695  
696  
697  
698  
699  
700  
701  
702  
703  
704  
705  
706  
707  
708  
709  
710  
711  
712  
713  
714  
715  
716  
717  
718  
719  
720  
721  
722  
723  
724  
725  
726  
727  
728  
729  
730  
731  
732  
733  
734  
735  
736  
737  
738  
739  
740  
741  
742  
743  
744  
745  
746  
747  
748  
749  
750  
751  
752  
753  
754  
755  
756  
757  
758  
759  
760  
761  
762  
763  
764  
765  
766  
767  
768  
769  
770  
771  
772  
773  
774  
775  
776  
777  
778  
779  
780  
781  
782  
783  
784  
785  
786  
787  
788  
789  
790  
791  
792  
793  
794  
795  
796  
797  
798  
799  
800  
801  
802  
803  
804  
805  
806  
807  
808  
809  
810  
811  
812  
813  
814  
815  
816  
817  
818  
819  
820  
821  
822  
823  
824  
825  
826  
827  
828  
829  
830  
831  
832  
833  
834  
835  
836  
837  
838  
839  
840  
841  
842  
843  
844  
845  
846  
847  
848  
849  
850  
851  
852  
853  
854  
855  
856  
857  
858  
859  
860  
861  
862  
863  
864  
865  
866  
867  
868  
869  
870  
871  
872  
873  
874  
875  
876  
877  
878  
879  
880  
881  
882  
883  
884  
885  
886  
887  
888  
889  
890  
891  
892  
893  
894  
895  
896  
897  
898  
899  
900  
901  
902  
903  
904  
905  
906  
907  
908  
909  
910  
911  
912  
913  
914  
915  
916  
917  
918  
919  
920  
921  
922  
923  
924  
925  
926  
927  
928  
929  
930  
931  
932  
933  
934  
935  
936  
937  
938  
939  
940  
941  
942  
943  
944  
945  
946  
947  
948  
949  
950  
951  
952  
953  
954  
955  
956  
957  
958  
959  
960  
961  
962  
963  
964  
965  
966  
967  
968  
969  
970  
971  
972  
973  
974  
975  
976  
977  
978  
979  
980  
981  
982  
983  
984  
985  
986  
987  
988  
989  
990  
991  
992  
993  
994  
995  
996  
997  
998  
999  
1000

**Deleted:** This gives further justificaton to continue postal surveys in health research since the results can help us understand the etiology and prevention process of a certain kind of disease. ¶

**Deleted:** Naturally, inaccuracy concerning the final diagnosis might be present but nevertheless the data can be considered as reliable as registry data based on clinical medical work generally can become. Moreover, there is no reason to assume that problems in reliability of the diagnoses would systematically be associated with the response status of the study members. The legislation in Finland enables use of mortality data for research purposes and thus we were able by ourselves to perform a mortality analysis for all respondents.

**Deleted:** ¶

1  
2  
3  
4  
5  
6  
7  
8  
9 Some inaccuracy concerning the final diagnosis of death is possible. Another  
10 study limitation is that data of socioeconomic status or educational level of non-  
11 respondents was not available and hence adjustments of the statistical analyses  
12 for these variables was not possible.  
13  
14  
15  
16  
17

## 18 Conclusions

19  
20  
21  
22 Total mortality was consistently 1.5 – 2 fold and for women in the age group >=  
23 50 years and for men in the age groups >=40 years significantly higher for the  
24 non-respondents of a nationwide mail survey compared to the respondents. For  
25 women this was mostly due to disease mortality in age group 50-54 years but for  
26 men due to mortality for external causes in age groups 30-34 and 40-44 years.  
27  
28 The most prominent excess mortality was seen for total mortality for both  
29 genders and for mortality due to external causes among men. Selection by  
30 health, especially mental health in men can cause bias in health related  
31 population surveys. However, this applies to prevalence estimates and does not  
32 necessarily jeopardize results from studies on risk and protective factors.  
33  
34  
35  
36  
37  
38  
39  
40  
41  
42  
43  
44

Deleted: moderately higher

Deleted:

Deleted: in both genders

Deleted: Hence, it seems justified to continue postal surveys in health research in order to improve understanding of etiology and prevention of diseases.

## 45 REFERENCES

46  
47 1. Helakorpi S., Prättälä R., Uutela A. Suomalaisen aikuisväestön  
48 terveystilanne ja terveys, kevät 2007. [Health Behaviour and Health  
49  
50  
51  
52  
53  
54  
55  
56  
57  
58  
59  
60



1  
2  
3  
4  
5  
6  
7  
8 among the Finnish Adult Population. Spring 2007] Publications of the National  
9 Public Health Institute. 2008;B 6.

10  
11  
12  
13 2. Kjølner M, Thoning H. Characteristics of non-response in the Danish Health  
14 Interview Surveys, 1987-1994. *Eur J Public Health* 2005;**15**(5):528-35 doi:  
15 10.1093/eurpub/cki023 [Advance Access published online July 28, 2005].  
16  
17

18  
19  
20 3. Cottler LB, Zipp JF, Robins LN, et al. Difficult-to-recruit respondents and their  
21 effect on prevalence estimates in an epidemiologic survey. *Am J Epidemiol*  
22 1987;**125**(2):329-39.  
23  
24

25  
26  
27 4. Jacobsen BK, Thelle DS. The Tromsø Heart Study: responders and non-  
28 responders to a health questionnaire, do they differ? *Scand J Soc Med*  
29 1988;**16**(2):101-4.  
30  
31

32  
33  
34 5. Bakke P, Gulsvik A, Lilleng P, et al. Postal survey on airborne occupational  
35 exposure and respiratory disorders in Norway: causes and consequences of non-  
36 response. *J Epidemiol Community Health* 1990;**44**(4):316-20.  
37  
38

39  
40 6. Jooste PL, Yach D, Steenkamp HJ, et al. Drop-out and newcomer bias in a  
41 community cardiovascular follow-up study. *Int J Epidemiol* 1990;**19**(2):284-9.  
42  
43

44  
45 7. Brussaard JH, Brants HA, Bouman M, et al. The study population: general  
46 characteristics and potential confounding factors. *Eur J Clin Nutr* 1997;**51** Suppl  
47 3:S19-24.  
48  
49  
50  
51  
52  
53  
54  
55  
56  
57  
58  
59  
60

- 1  
2  
3  
4  
5  
6  
7  
8 8. Rönmark E, Lundqvist A, Lundbäck B, et al. Non-responders to a postal  
9 questionnaire on respiratory symptoms and diseases. *Eur J Epidemiol*  
10 1999;**15**(3):293-9.  
11  
12  
13  
14  
15 9. Korkeila K, Suominen S, Ahvenainen J, et al. Non-response and related  
16 factors in a nation-wide health survey. *Eur J Epidemiol*. 2001;**17**(11):991-9.  
17  
18  
19  
20 10. van den Akker M, Buntinx F, Metsemakers JF, et al. Morbidity in responders  
21 and non-responders in a register-based population survey. *Fam Pract*  
22 1998;**15**(3):261-3.  
23  
24  
25  
26  
27 11. Sonne-Holm S, Sørensen TI, Jensen G, et al. Influence of fatness,  
28 intelligence, education and sociodemographic factors on response rate in a  
29 health survey. *J Epidemiol Community Health* 1989;**43**(4):369-74.  
30  
31  
32  
33 12. Asch DA, Jedrzejewski MK, Christakis NA. Response rates to mail surveys  
34 published in medical journals. *J Clin Epidemiol* 1997;**50**(10):1129-36.  
35  
36  
37  
38 13. Heilbrun LK, Ross PD, Wasnich RD, et al. Characteristics of respondents and  
39 nonrespondents in a prospective study of osteoporosis. *J Clin Epidemiol*  
40 1991;**44**(3):233-9.  
41  
42  
43  
44  
45 14. Ferrie JE, Kivimäki M, Singh-Manoux A, et al. Non-response to baseline,  
46 non-response to follow-up and mortality in the Whitehall II cohort. *Int J Epidemiol*  
47 2009;**38**(3):831-7 doi:10.1093/ije/dyp153 [Advance Access publication 5 March  
48 2009].  
49  
50  
51  
52  
53  
54  
55  
56  
57  
58  
59  
60

1  
2  
3  
4  
5  
6  
7  
8  
9  
10  
11  
12  
13  
14  
15  
16  
17  
18  
19  
20  
21  
22  
23  
24  
25  
26  
27  
28  
29  
30  
31  
32  
33  
34  
35  
36  
37  
38  
39  
40  
41  
42  
43  
44  
45  
46  
47  
48  
49  
50  
51  
52  
53  
54  
55  
56  
57  
58  
59  
60

15. ~~Greene N, Greenland S, Olsen J, Aagard Nohr E. Estimating Bias From Loss to Follow-up in the Danish National Birth Cohort. *Epidemiology* 2011;**22**:815–822.~~

16. Foster K, Campbell D, Crum J, et al. Non-response in a population study after an environmental disaster. *Public Health* 1995;**109**(4):267-73.

17. Janzon L, Hanson BS, Isacson SO, et al. Factors influencing participation in health surveys. Results from prospective population study 'Men born in 1914' in Malmö, Sweden. *J Epidemiol Community Health* 1986;**40**(2):174-7.

18. Dunne MP, Martin NG, Bailey JM, et al. Participation bias in a sexuality survey: psychological and behavioural characteristics of responders and non-responders. *Int J Epidemiol* 1997;**26**(4):844-54.

19. Tennant A, Badley EM. A confidence interval approach to investigating non-response bias and monitoring response to postal questionnaires. *J Epidemiol Community Health* 1991;**45**(1):81-5.

20. Lahaut, V. M. H. C. J., Jansen HAM, van de Mheen D, et al. Estimating non-response bias in a survey on alcohol consumption: comparison of response waves. *Alcohol Alcohol* 2003;**38**(2):128-34 [doi:10.1093/alcalc/agg044].

21. Martikainen P, Laaksonen M, Piha K, et al. Does survey non-response bias the association between occupational social class and health? *Scand J Public Health* 2007;**35**(2):212-5 [doi:10.1080/14034940600996563].

**Formatted:** Font: 12 pt

**Deleted:** Mattila VM, Parkkari J, Rimpelä A. Adolescent survey non-response and later risk of death. A prospective cohort study of 78 609 persons with 11-year follow-up. *BMC Public Health* 2007;**7**(1):87 doi:10.1186/1471-2458-7-87 [Published: 22 May 2007].

**Formatted:** Font: 12 pt

**Formatted:** Normal, Line spacing: 1.5 lines, Don't adjust space between Latin and Asian text, Don't adjust space between Asian text and numbers

**Formatted:** Font: (Default) Arial, 12 pt, English (U.S.), Check spelling and grammar

**Formatted:** Font: 12 pt, Check spelling and grammar

**Formatted:** Font: (Default) Arial, 12 pt, English (U.S.), Check spelling and grammar

**Formatted:** Font: (Default) Arial, 12 pt, Check spelling and grammar

**Formatted:** Font: (Default) Arial, 12 pt, Bold, Check spelling and grammar

**Formatted:** Font: (Default) Arial, 12 pt, Check spelling and grammar

**Formatted:** Font: 12 pt, English (U.S.), Check spelling and grammar

1  
2  
3  
4  
5  
6  
7  
8 22. Koskenvuo M, Kaprio J, Kesaniemi A, et al. Alcohol-related diseases  
9 associated with ischaemic heart disease: a three-year follow-up of middle-aged  
10 male hospital patients. *Alcohol Alcohol* 1986;**21**(3):251-6.  
11  
12

13  
14  
15 23. Boersma F, Eefsting JA, van den Brink W, et al. Characteristics of non-  
16 responders and the impact of non-response on prevalence estimates of  
17 dementia. *Int J Epidemiol* 1997;**26**(5):1055-62.  
18  
19  
20  
21  
22  
23  
24  
25  
26  
27  
28  
29  
30  
31  
32  
33  
34  
35  
36  
37  
38  
39  
40  
41  
42  
43  
44  
45  
46  
47  
48  
49  
50  
51  
52  
53  
54  
55  
56  
57  
58  
59  
60

1  
2  
3  
4  
5  
6  
7  
8  
9 Acknowledgements

10  
11  
12 The study was supported by the Academy of Finland (three different decisions on  
13  
14 funding)

15  
16  
17 The authors do not declare any competing interests  
18  
19  
20  
21  
22  
23  
24  
25  
26  
27  
28  
29  
30  
31  
32  
33  
34  
35  
36  
37  
38  
39  
40  
41  
42  
43  
44  
45  
46  
47  
48  
49  
50  
51  
52  
53  
54  
55  
56  
57  
58  
59  
60

STROBE 2007 (v4) Statement—Checklist of items that should be included in reports of cohort studies

| Section/Topic             | Item # | Recommendation                                                                                                                                                                       | Reported on page # |
|---------------------------|--------|--------------------------------------------------------------------------------------------------------------------------------------------------------------------------------------|--------------------|
| Title and abstract        | 1      | (a) Indicate the study’s design with a commonly used term in the title or the abstract                                                                                               | 1                  |
|                           |        | (b) Provide in the abstract an informative and balanced summary of what was done and what was found                                                                                  | 4                  |
| <b>Introduction</b>       |        |                                                                                                                                                                                      |                    |
| Background/rationale      | 2      | Explain the scientific background and rationale for the investigation being reported                                                                                                 | 6-7                |
| Objectives                | 3      | State specific objectives, including any pre-specified hypotheses                                                                                                                    | 7                  |
| <b>Methods</b>            |        |                                                                                                                                                                                      |                    |
| Study design              | 4      | Present key elements of study design early in the paper                                                                                                                              | 8-9                |
| Setting                   | 5      | Describe the setting, locations, and relevant dates, including periods of recruitment, exposure, follow-up, and data collection                                                      | 8-9                |
| Participants              | 6      | (a) Give the eligibility criteria, and the sources and methods of selection of participants. Describe methods of follow-up                                                           | 8-9                |
|                           |        | (b) For matched studies, give matching criteria and number of exposed and unexposed                                                                                                  |                    |
| Variables                 | 7      | Clearly define all outcomes, exposures, predictors, potential confounders, and effect modifiers. Give diagnostic criteria, if applicable                                             | 8-9                |
| Data sources/ measurement | 8*     | For each variable of interest, give sources of data and details of methods of assessment (measurement). Describe comparability of assessment methods if there is more than one group | 8-9                |
| Bias                      | 9      | Describe any efforts to address potential sources of bias                                                                                                                            | 8-9                |
| Study size                | 10     | Explain how the study size was arrived at                                                                                                                                            | 9                  |
| Quantitative variables    | 11     | Explain how quantitative variables were handled in the analyses. If applicable, describe which groupings were chosen and why                                                         | 9-10               |
| Statistical methods       | 12     | (a) Describe all statistical methods, including those used to control for confounding                                                                                                | 9-10               |
|                           |        | (b) Describe any methods used to examine subgroups and interactions                                                                                                                  | 9-10               |
|                           |        | (c) Explain how missing data were addressed                                                                                                                                          | 9                  |
|                           |        | (d) If applicable, explain how loss to follow-up was addressed                                                                                                                       | 8-9                |
|                           |        | (e) Describe any sensitivity analyses                                                                                                                                                |                    |
| <b>Results</b>            |        |                                                                                                                                                                                      |                    |

|                          |     |                                                                                                                                                                                                                |                     |
|--------------------------|-----|----------------------------------------------------------------------------------------------------------------------------------------------------------------------------------------------------------------|---------------------|
| Participants             | 13* | (a) Report numbers of individuals at each stage of study—e.g. numbers potentially eligible, examined for eligibility, confirmed eligible, included in the study, completing follow-up, and analysed            | 8-9                 |
|                          |     | (b) Give reasons for non-participation at each stage                                                                                                                                                           | 8-9                 |
|                          |     | (c) Consider use of a flow diagram                                                                                                                                                                             |                     |
| Descriptive data         | 14* | (a) Give characteristics of study participants (e.g. demographic, clinical, social) and information on exposures and potential confounders                                                                     | Table 1, 11-12      |
|                          |     | (b) Indicate number of participants with missing data for each variable of interest                                                                                                                            | Table 1, 11-12      |
|                          |     | (c) Summarise follow-up time (e.g., average and total amount)                                                                                                                                                  | 8-9, Table 1, 11-12 |
| Outcome data             | 15* | Report numbers of outcome events or summary measures over time                                                                                                                                                 | Table 1, 11-12      |
| Main results             | 16  | (a) Give unadjusted estimates and, if applicable, confounder-adjusted estimates and their precision (e.g., 95% confidence interval). Make clear which confounders were adjusted for and why they were included | Table 2-4, 13-14    |
|                          |     | (b) Report category boundaries when continuous variables were categorized                                                                                                                                      | 8-9                 |
|                          |     | (c) If relevant, consider translating estimates of relative risk into absolute risk for a meaningful time period                                                                                               |                     |
| Other analyses           | 17  | Report other analyses done—e.g. analyses of subgroups and interactions, and sensitivity analyses                                                                                                               |                     |
| <b>Discussion</b>        |     |                                                                                                                                                                                                                |                     |
| Key results              | 18  | Summarise key results with reference to study objectives                                                                                                                                                       | 14                  |
| <b>Limitations</b>       |     |                                                                                                                                                                                                                |                     |
| Interpretation           | 20  | Give a cautious overall interpretation of results considering objectives, limitations, multiplicity of analyses, results from similar studies, and other relevant evidence                                     | 15-18               |
| Generalisability         | 21  | Discuss the generalisability (external validity) of the study results                                                                                                                                          | 15-18               |
| <b>Other information</b> |     |                                                                                                                                                                                                                |                     |
| Funding                  | 22  | Give the source of funding and the role of the funders for the present study and, if applicable, for the original study on which the present article is based                                                  | 22                  |

\*Give information separately for cases and controls in case-control studies and, if applicable, for exposed and unexposed groups in cohort and cross-sectional studies.

**Note:** An Explanation and Elaboration article discusses each checklist item and gives methodological background and published examples of transparent reporting. The STROBE checklist is best used in conjunction with this article (freely available on the Web sites of PLoS Medicine at <http://www.plosmedicine.org/>, Annals of Internal Medicine at <http://www.annals.org/>, and Epidemiology at <http://www.epidem.com/>). Information on the STROBE Initiative is available at [www.strobe-statement.org](http://www.strobe-statement.org).



**Non-response in a nationwide follow-up postal survey in Finland: A register-based mortality analysis of respondents and non-respondents of the Health and Social Support (HeSSup) Study**

|                                    |                                                                                                                                                                                                                                                                                                                                                                                                                                                                                                                                                                                                                                                                                                                                                                                                                       |
|------------------------------------|-----------------------------------------------------------------------------------------------------------------------------------------------------------------------------------------------------------------------------------------------------------------------------------------------------------------------------------------------------------------------------------------------------------------------------------------------------------------------------------------------------------------------------------------------------------------------------------------------------------------------------------------------------------------------------------------------------------------------------------------------------------------------------------------------------------------------|
| Journal:                           | <i>BMJ Open</i>                                                                                                                                                                                                                                                                                                                                                                                                                                                                                                                                                                                                                                                                                                                                                                                                       |
| Manuscript ID:                     | bmjopen-2011-000657.R2                                                                                                                                                                                                                                                                                                                                                                                                                                                                                                                                                                                                                                                                                                                                                                                                |
| Article Type:                      | Research                                                                                                                                                                                                                                                                                                                                                                                                                                                                                                                                                                                                                                                                                                                                                                                                              |
| Date Submitted by the Author:      | 27-Jan-2012                                                                                                                                                                                                                                                                                                                                                                                                                                                                                                                                                                                                                                                                                                                                                                                                           |
| Complete List of Authors:          | Suominen, Sakari; University of Turku, Department of Public Health<br>Koskenvuo, Karoliina; The Social Insurance Institution of Finland,<br>Sillanmaki, Lauri; University of Helsinki, Hjelt Institute, Department of<br>Public Health<br>Vahtera, Jussi; University of Turku, Department of Public Health<br>Korkeila, Katariina; City of Raisio,<br>Kivimaki, Mika; University College London, Department of Epidemiology<br>and Public Health<br>Mattila, Kari; Hospital District of Pirkanmaa, Centre of General Practice<br>Virtanen, Pekka; Tampere School of Public Health, University of Tampere<br>Sumanen, Markku; University of Tampere,<br>Rautava, Paivi; University of Turku, Department of Public Health<br>Koskenvuo, Markku; University of Helsinki, Hjelt Institute, Department of<br>Public Health |
| <b>Primary Subject<br>Heading</b>: | Epidemiology                                                                                                                                                                                                                                                                                                                                                                                                                                                                                                                                                                                                                                                                                                                                                                                                          |
| Secondary Subject Heading:         | Research methods, Occupational and environmental medicine                                                                                                                                                                                                                                                                                                                                                                                                                                                                                                                                                                                                                                                                                                                                                             |
| Keywords:                          | EPIDEMIOLOGY, PUBLIC HEALTH, SOCIAL MEDICINE                                                                                                                                                                                                                                                                                                                                                                                                                                                                                                                                                                                                                                                                                                                                                                          |
|                                    |                                                                                                                                                                                                                                                                                                                                                                                                                                                                                                                                                                                                                                                                                                                                                                                                                       |



1  
2  
3 **Non-response in a nationwide follow-up postal survey in Finland: A**  
4  
5 **register-based mortality analysis of respondents and non-respondents of**  
6  
7 **the Health and Social Support (HeSSup) Study**  
8  
9

10  
11  
12 Sakari Suominen contributed substantially to acquisition of data, the design of  
13 the study and to the interpretation of the data, wrote the first draft of the ms and  
14 revised it several times critically for important intellectual content.  
15  
16  
17

18  
19  
20 Karoliina Koskenvuo contributed substantially to acquisition of data, the design of  
21 the study, carried out the first data analyses, contributed substantially to the  
22 interpretation of the data and revised the ms critically several times for important  
23 intellectual content.  
24  
25  
26

27  
28  
29 Lauri Sillanmäki contributed substantially to acquisition of data, the design of the  
30 study, carried out data analyses, contributed substantially to the interpretation of  
31 the data and revised the ms critically several times for important intellectual  
32 content.  
33  
34  
35

36  
37  
38 Jussi Vahtera and Mika Kivimäki contributed substantially to the design of the  
39 study and to the interpretation of the data and revised the ms critically several  
40 times for important intellectual content.  
41  
42  
43

44  
45  
46 Katariina Korkeila, Kari J. Mattila and Markku Koskenvuo contributed substantially  
47 to acquisition of data, the design of the study and to the interpretation of the data  
48 and revised the ms critically several times for important intellectual content.  
49  
50  
51

1  
2  
3 Pekka J. Virtanen and Markku Sumanen contributed substantially to the  
4  
5 interpretation of the data and revised the ms critically several times for important  
6  
7 intellectual content.  
8  
9

10 Päivi Rautava contributed substantially to acquisition of data, the interpretation of  
11  
12 the data and revised the ms critically several times for important intellectual  
13  
14 content.  
15  
16

17 All the authors have read and approved the final version of the ms.  
18  
19  
20  
21  
22  
23  
24  
25  
26  
27  
28  
29  
30  
31  
32  
33  
34  
35  
36  
37  
38  
39  
40  
41  
42  
43  
44  
45  
46  
47  
48  
49  
50  
51  
52  
53  
54  
55  
56  
57  
58  
59  
60

**ABSTRACT****Objective**

To examine difference in mortality between postal survey non-respondents and respondents.

**Design**

A prospective cohort study with baseline survey in 1998 and comprehensive linkage to national mortality registers until 2005, the Health and Social Support (HeSSup) study.

**Setting**

A population based postal survey of the working aged population in Finland in 1998

**Participants**

The original random sample comprised 64,797 working-aged individuals in Finland (20-24, 30-34, 40-44, 50-54 years of age; 32,059 women and 32,716 men), yielding 25,898 (40.0%) responses in the baseline postal survey in 1998.

**Primary outcome measure**

Registry based primary causes of death encoded with the International Classification of Diseases (ICD-10)

**Results**

In women, hazard ratio for total mortality was 1.75 (95% confidence interval 1.40 - 2.19) times higher among the non-respondents compared to the respondents. In men, non-response was associated with a 1.41 fold (1.21 - 1.65) excess risk of total mortality. Non-response associated in certain age groups with deaths due to diseases in women and with deaths due to external causes in men. The most prominent excess mortality was seen for total mortality for both genders and for mortality due to external causes among men.

**Conclusions**

Postal surveys result in slight underestimation of illness prevalence.

Word Count of Abstract 201

1  
2  
3  
4  
5  
6  
7  
8  
9  
10  
11  
12  
13  
14  
15  
16  
17  
18  
19  
20  
21  
22  
23  
24  
25  
26  
27  
28  
29  
30  
31  
32  
33  
34  
35  
36  
37  
38  
39  
40  
41  
42  
43  
44  
45  
46  
47  
48  
49  
50  
51  
52  
53  
54  
55  
56  
57  
58  
59  
60

## Keywords

Follow-up Studies, Non-respondents, Mortality, Health Surveys, Registries

## Article summary

### Article focus

Women and individuals from upper social strata tend to participate more actively in postal health surveys

What this exactly means in terms of health selection among respondents is unclear

Postal health surveys are believed to produce underestimates of illness prevalence

### Key message

Total mortality was consistently and for women in the age group  $\geq 50$  years and for men in the age groups  $\geq 40$  years significantly higher among non-respondents compared to respondents during a 7 year follow-up among a total Finnish nationwide sample in working age comprising almost 65 000 individuals

The excess mortality observed was 1,5 – 2 fold. Among men it was explained by external causes, whereas among women it was due to diseases and was statistically significant only in the age group 50 – 54 years

Postal surveys result in slight underestimation of illness prevalence

### Strengths and limitations of the study

The linkage to mortality data was successful for virtually all individuals of the original sample comprising nearly 65 000 individuals. The sample size secures the reliability of the conclusions drawn. Furthermore, the registry data on mortality in Finland can be considered as reliable. To the best of the authors' knowledge a corresponding study based on a as large a sample as in this study has not previously been carried out.

Some inaccuracy concerning the final diagnosis of death is possible. A further study limitation is that data of socioeconomic status or educational level of non-

1  
2  
3  
4  
5  
6  
7  
8  
9  
10  
11  
12  
13  
14  
15  
16  
17  
18  
19  
20  
21  
22  
23  
24  
25  
26  
27  
28  
29  
30  
31  
32  
33  
34  
35  
36  
37  
38  
39  
40  
41  
42  
43  
44  
45  
46  
47  
48  
49  
50  
51  
52  
53  
54  
55  
56  
57  
58  
59  
60

respondents was not available and hence adjustments of the statistical analyses for these variables was not possible.

For peer review only

## INTRODUCTION

Word count without Abstract, Tables and References 1735

Response rates in health related postal surveys are declining in the Western world. In the Nordic countries the situation has been somewhat better compared to the rest of Europe and the U.S.A., but recently even there declining trends have been observed [1, 2]. Previous studies have suggested that women, older persons and persons from upper social strata tend to participate more actively in health surveys compared with the rest [3 - 11]. However, not all studies have consistently supported these observations [10, 12, 13]. Furthermore, recent studies have extended analysis of non-response beyond demographic variables showing lower rate of hospital admissions [2], mortality and maternal smoking during pregnancy among the participants as compared to non-participants [14, 15].

Studies on causes for non-participation to health surveys have revealed incorrect address or incorrect delivery by post to contribute to some of the drop out [5, 8, 16]. The non-respondents themselves have reported various kinds of reasons for their behaviour, such as gaining no benefit for participation [5, 16], no interest in the topic [7, 8, 16, 17], feeling of intrusion of privacy [8], lack of time [7, 8, 17], forgetfulness [8], and present illness [17]. Surveys including questions on issues perceived as intimate have often decreased participation rates [18]. It has also been speculated that late respondents might resemble more the non-participants [5, 17, 19] but to date decisive evidence for this pattern is lacking [20]. In follow-

1  
2  
3 up studies, participation has been explored according to the number of rounds  
4  
5 the individual has taken part in [14] and more occasions of non-response found  
6  
7 to be positively associated with subsequent mortality rates. On the whole, health  
8  
9 selection among participants might decrease the generalizability of prevalence  
10  
11 estimates but this effect is until now not satisfactorily described [21]. However,  
12  
13 even in the case of health selection the results related to the strength of  
14  
15 association between the variables studied need not necessarily be biased [15,  
16  
17  
18  
19  
20  
21  
22  
23  
24  
25  
26  
27  
28  
29  
30  
31  
32  
33  
34  
35  
36  
37  
38  
39  
40  
41  
42  
43  
44  
45  
46  
47  
48  
49  
50  
51  
52  
53  
54  
55  
56  
57  
58  
59  
60

A non-response analysis of the postal survey of the population-based Health and Social Support (HeSSup) study - which achieved a relatively modest (40 %) response rate [9] - replicated previous findings on the differences in demographic characteristics between respondents and non-respondents. The aim of the present study was to extend these analyses to explore whether survey non-respondents differ from the respondents in terms of mortality (all-cause, disease mortality, mortality for external causes).

## **MATERIALS AND METHODS**

The study is based on the complete sample (N=64, 797) of the Health and Social Support (HeSSup) prospective mail survey initiated in 1998. The concurrent joint Ethics Committee of the University of Turku and the Turku University Central Hospital considered approval not necessary for a normal cohort study, but all

1  
2  
3 participants were requested to sign a consent form containing information about  
4  
5 the study and to grant permission to allow subsequent studies with the same  
6  
7 data set and possibility to link with national health registries. The sample  
8  
9 represented the concurrent age groups of 20-24, 30-34, 40-44 and 50-54 years  
10  
11 of age in Finland [9]. However, by purpose the Swedish speaking Finns (5% of  
12  
13 the general population) as well as the Turku region were slightly  
14  
15 overrepresented. Of the 64,797 persons, 22 could not be included in the present  
16  
17 study since the follow-up had to be set to begin from the first death among  
18  
19 respondents which was September 22<sup>nd</sup> 1998. Certain cases of deaths among  
20  
21 non-respondents had occurred already earlier and potentially before sending out  
22  
23 the initial questionnaire. Totally 25,898 satisfactory responses were returned. In  
24  
25 2007, the survey material was by means of an unique social security number  
26  
27 linked to Statistics Finland data on mortality between the years 1998 and 2005.  
28  
29 Totally 1,174 cases of deaths among 25,290 observations that could be linked  
30  
31 with registry data were identified. Moreover, mortality data of non-respondents  
32  
33 from the same time period was likewise as for respondents obtained from  
34  
35 Statistics Finland and further analyzed by age group and gender.  
36  
37  
38  
39  
40  
41  
42  
43  
44  
45

46 The outcome variable was primary causes of death encoded with the  
47  
48 International Classification of Diseases (ICD-10). Mortality for external causes  
49  
50 (S00 - Y98) and disease mortality (A00 – R99) were examined separately. The  
51  
52 differences in mortality between non-respondents and respondents were  
53  
54 analysed separately for women and men using Cox proportional hazards  
55  
56  
57  
58  
59  
60



1  
2  
3 regression. The analyses were carried out by the research group. Hazard ratios  
4 (HR) with 95% confidence intervals (95% CI) for mortality (total, external causes,  
5 disease) of non-respondents vs. respondents according to age (1998) were  
6 reported. Cox proportional hazard assumptions were tested by visual  
7 examination of log-minus-log plots showing parallelism among the selected strata  
8 variable (responding status). The statistical analysis was performed by the SAS  
9  
10  
11  
12  
13  
14  
15  
16  
17  
18  
19  
20  
21  
22  
23  
24  
25  
26  
27  
28  
29  
30  
31  
32  
33  
34  
35  
36  
37  
38  
39  
40  
41  
42  
43  
44  
45  
46  
47  
48  
49  
50  
51  
52  
53  
54  
55  
56  
57  
58  
59  
60

® software 9.2. for Windows.

## RESULTS

Between the years 1998 to 2005, 1,174 individuals belonging to the complete sample died (Table 1). Of the deaths, 70% occurred in men.

Table 1. Demographics of respondents and non-respondents and number of deaths during follow-up from 1998 to 2005 (N and %).

|                                                             | Respondents |       | Non-respondents |       | Total  |       |
|-------------------------------------------------------------|-------------|-------|-----------------|-------|--------|-------|
|                                                             | N           | %     | N               | %     | N      | %     |
| <b>Gender</b>                                               |             |       |                 |       |        |       |
| Women                                                       | 14,922      | 59.0  | 17,137          | 43.4  | 32,059 | 49.5  |
| Men                                                         | 10,368      | 41.0  | 22,348          | 56.6  | 32,716 | 50.5  |
| Total                                                       | 25,290      | 100.0 | 39,485          | 100.0 | 64,775 | 100.0 |
| <b>Age in 1998</b>                                          |             |       |                 |       |        |       |
| 20-24 y                                                     | 6,783       | 26.8  | 9,405           | 23.8  | 16,188 | 25.0  |
| 30-34 y                                                     | 5,981       | 23.7  | 10,267          | 26.0  | 16,248 | 25.1  |
| 40-44 y                                                     | 6,073       | 24.0  | 10,198          | 25.8  | 16,271 | 25.1  |
| 50-54 y                                                     | 6,453       | 25.5  | 9,615           | 24.4  | 16,068 | 24.8  |
| Total                                                       | 25,290      | 100.0 | 39,485          | 100.0 | 64,775 | 100.0 |
| <b>Number of deaths by gender</b>                           | N           | %     | N               | %     | N      | %     |
| In women                                                    | 110         | 0.7   | 240             | 1.4   | 350    | 1.1   |
| In men                                                      | 218         | 2.1   | 606             | 2.7   | 824    | 2.5   |
| Total                                                       | 328         | 1.3   | 846             | 2.1   | 1,174  | 1.8   |
| <b>Number of deaths by age in 1998</b>                      |             |       |                 |       |        |       |
| 20-24 y                                                     | 21          | 0.3   | 47              | 0.5   | 68     | 0.4   |
| 30-34 y                                                     | 38          | 0.6   | 105             | 1.0   | 143    | 0.8   |
| 40-44 y                                                     | 85          | 1.4   | 252             | 2.5   | 337    | 2.1   |
| 50-54 y                                                     | 184         | 2.9   | 442             | 4.6   | 626    | 3.9   |
| Total                                                       | 328         | 1.3   | 846             | 2.1   | 1,174  | 1.8   |
| <b>Number of deaths from external causes</b>                |             |       |                 |       |        |       |
| In women                                                    | 26          | 0.2   | 48              | 0.3   | 74     | 0.2   |
| In men                                                      | 55          | 0.5   | 217             | 1.0   | 272    | 0.8   |
| Total                                                       | 81          | 0.3   | 265             | 0.7   | 346    | 0.5   |
| <b>Number of deaths from external causes by age in 1998</b> |             |       |                 |       |        |       |
| 20-24 y                                                     | 10          | <0.1  | 32              | <0.1  | 42     | <0.1  |
| 30-34 y                                                     | 16          | <0.1  | 66              | 0.2   | 82     | 0.1   |
| 40-44 y                                                     | 22          | <0.1  | 90              | 0.2   | 112    | 0.2   |
| 50-54 y                                                     | 33          | 0.1   | 77              | 0.2   | 110    | 0.2   |
| Total                                                       | 81          | 0.3   | 265             | 0.7   | 346    | 0.5   |

Table 1 continued. Demographics of respondents and non-respondents and number of deaths during follow-up from 1998 to 2005 (N and %).

|                                                 | Respondents |      | Non-respondents |      | Total |      |
|-------------------------------------------------|-------------|------|-----------------|------|-------|------|
|                                                 | N           | %    | N               | %    | N     | %    |
| Number of deaths due to diseases                |             |      |                 |      |       |      |
| In women                                        | 84          | 0.6  | 192             | 1.1  | 276   | 0.9  |
| In men                                          | 163         | 1.6  | 389             | 1.7  | 552   | 1.7  |
| Total                                           | 247         | 1.0  | 581             | 1.5  | 828   | 1.3  |
| Number of deaths due to diseases by age in 1998 |             |      |                 |      |       |      |
| 20-24 y                                         | 11          | <0.1 | 15              | <0.1 | 26    | <0.1 |
| 30-34 y                                         | 22          | <0.1 | 39              | <0.1 | 61    | <0.1 |
| 40-44 y                                         | 63          | 0.2  | 162             | 0.4  | 225   | 0.3  |
| 50-54 y                                         | 151         | 0.6  | 365             | 0.9  | 516   | 0.8  |
| Total                                           | 247         | 1.0  | 581             | 1.5  | 828   | 1.3  |

Total mortality was higher for non-respondent women in age group 50-54 years and for non-respondent men in age group 40-44 and 50-54 years and for each gender with all age groups combined. In analyses combining women and men, excess total mortality associated with non-response was observed in age groups 40-44 and 50-54 when age groups were examined separately as well as when all observations were combined (Table 2). Non-respondent men had a higher mortality for external causes in age groups 30-34 and 40-44 years and with all age groups combined. In analyses with genders combined, this was seen in age groups 30-34 and 40-44 years and when all observations were combined. In women, no statistically significant differences in mortality for external causes were detected (Table 3). Non-respondent women showed significantly higher disease-related mortality in age group 50-54 years as well as when all age groups were combined. The same held true for both genders when age groups 40-44 and 50-54 years were examined separately as well as when all

observations were combined. On the other hand, in separate analyses for men non-respondents showed a slightly increased disease mortality compared to respondents only when all age groups were combined (Table 4).

Table 2. Hazard ratios for total mortality of non-respondents vs. respondents and the 95% CIs according to gender and age at the beginning of the follow-up in 1998.

| Non-respondents vs. respondents (=1.00) | Age in 1998<br>20-24 | Age in 1998<br>30-34 | Age in 1998<br>40-44              | Age in 1998<br>50-54              | Total age or age & gender adjusted |
|-----------------------------------------|----------------------|----------------------|-----------------------------------|-----------------------------------|------------------------------------|
| Women                                   | 1.00<br>(0.34-2.97)  | 1.45<br>(0.77-2.73)  | 1.40<br>(0.93-2.10)               | <b>2.17</b><br><b>(1.58-2.98)</b> | <b>1.75</b><br><b>(1.40-2.19)</b>  |
| Men                                     | 1.28<br>(0.70-2.34)  | 1.41<br>(0.89-2.24)  | <b>1.71</b><br><b>(1.25-2.35)</b> | <b>1.31</b><br><b>(1.07-1.61)</b> | <b>1.41</b><br><b>(1.21-1.65)</b>  |
| Total gender or age & gender adjusted   | 1.21<br>(0.71-2.04)  | 1.42<br>(0.98-2.07)  | <b>1.59</b><br><b>(1.24-2.04)</b> | <b>1.54</b><br><b>(1.29-1.83)</b> | <b>1.52</b><br><b>(1.34-1.73)</b>  |

Statistically significant associations are in bold.

Table 3. Hazard ratios for deaths due to external causes in non-respondents vs. respondents and the 95% CIs according to gender and age at the beginning of the follow-up in 1998.

| Non-respondents vs. respondents (=1.00) | Age in 1998<br>20-24 | Age in 1998<br>30-34              | Age in 1998<br>40-44              | Age in 1998<br>50-54 | Total age or age & gender adjusted |
|-----------------------------------------|----------------------|-----------------------------------|-----------------------------------|----------------------|------------------------------------|
| Women                                   | 4.65<br>(0.52-41.62) | 1.94<br>(0.68-5.49)               | 1.38<br>(0.58-3.28)               | 1.18<br>(0.57-2.45)  | 1.50<br>(0.93-2.42)                |
| Men                                     | 1.36<br>(0.64-2.88)  | <b>2.04</b><br><b>(1.07-3.90)</b> | <b>2.42</b><br><b>(1.37-4.28)</b> | 1.62<br>(0.99-2.67)  | <b>1.87</b><br><b>(1.39-2.52)</b>  |
| Total gender or age & gender adjusted   | 1.61<br>(0.78-3.30)  | <b>2.01</b><br><b>(1.16-3.49)</b> | <b>2.07</b><br><b>(1.30-3.31)</b> | 1.47<br>(0.98-2.22)  | <b>1.78</b><br><b>(1.39-2.29)</b>  |

Statistically significant associations are in bold.

Table 4. Hazard ratios for disease mortality of non-respondents vs. respondents and the 95% CIs according to gender and age at the beginning of the follow-up in 1998.

| Non-respondents vs. respondents (=1.00) | Age in 1998<br>20-24 | Age in 1998<br>30-34 | Age in 1998<br>40-44              | Age in 1998<br>50-54              | Total age or age & gender adjusted |
|-----------------------------------------|----------------------|----------------------|-----------------------------------|-----------------------------------|------------------------------------|
| Women                                   | 0.39<br>(0.08-1.92)  | 1.21<br>(0.54-2.69)  | 1.41<br>(0.88-2.23)               | <b>2.46</b><br><b>(1.73-3.52)</b> | <b>1.83</b><br><b>(1.41-2.36)</b>  |
| Men                                     | 1.13<br>(0.40-3.18)  | 0.83<br>(0.42-1.66)  | 1.43<br>(0.98-2.09)               | 1.25<br>(1.00-1.57)               | <b>1.25</b><br><b>(1.04-1.51)</b>  |
| Total gender or age & gender adjusted   | 0.81<br>(0.37-1.80)  | 0.98<br>(0.58-1.67)  | <b>1.42</b><br><b>(1.06-1.90)</b> | <b>1.55</b><br><b>(1.28-1.88)</b> | <b>1.43</b><br><b>(1.23-1.66)</b>  |

Statistically significant associations are in bold.

## DISCUSSION

In this large population-based epidemiological study, comparison of mortality of non-respondents with respondents showed, as expected, consistently higher mortality rates among the former group. The differences between non-respondents and respondents were 1.5 – 2 fold and of quite similar magnitude for both genders although with varying causes. Among women the greatest statistically significant differences were seen in disease mortality in the oldest age group of initially 50–54 years of age. The greatest significant differences for men were caused by external causes of death and involved age groups 30- 34 and 40-44 years. However, it is worth to notice that an increase of total mortality of the magnitude seen in this study implies approximately 300 extra deaths among non-respondents during the follow-up of 7 years.

1  
2  
3  
4  
5  
6 Postal surveys are frequently used in population based health research. The  
7  
8 impact of health selection on the results has been studied but not very  
9  
10 extensively. An affirmative view on the potential demographic difference between  
11  
12 respondents and non-respondents is still lacking. According to previous findings  
13  
14 [3, 8, 9], respondents tend to be somewhat healthier and report a more  
15  
16 favourable health behaviour compared to non-respondents. However, the bias  
17  
18 caused by this was limited and applied mainly to health problems or risk  
19  
20 behaviours that generally are not eagerly communicated to others, such as  
21  
22 mental problems or binge drinking. From previous studies it is also known that  
23  
24 women as well as those well off in the society tend to participate more actively in  
25  
26 health related survey research on the whole. Hence, this might result in under-  
27  
28 estimation of the prevalence of health problems common among men as well as  
29  
30 individuals from lower social strata. Results from a previous non-response  
31  
32 analysis of the initial phase of this study supports this view [9]. Women as well as  
33  
34 individuals with high level of education were somewhat over represented among  
35  
36 respondents but no clear health-related selection could be shown. According to  
37  
38 our present results 7 years later the potential health-related selection can be  
39  
40 further clarified. In Finland, mortality for external causes is intimately associated  
41  
42 with alcohol consumption and alcoholism [22]. As could be expected, we could  
43  
44 see a significantly higher mortality for external causes among male non-  
45  
46 respondents as compared with the respondents.  
47  
48  
49  
50  
51  
52  
53  
54  
55  
56  
57  
58  
59  
60

1  
2  
3 Moreover, in previous studies [23] it has also been pointed out that non-  
4  
5 respondents are not necessarily a homogenic group but can differ internally, e.g.  
6  
7 depending on to which wave of the survey if any they have taken part in. Also the  
8  
9 correspondence between late respondents and total non-respondents has been  
10  
11 questioned [20].  
12  
13

14  
15  
16  
17 Given the health selection related to postal surveys it has to be kept in mind that  
18  
19 population studies usually do not focus solely on prevalence estimates anymore  
20  
21 but more or less on potential risk or protective factors of certain health problems.  
22  
23 From previous research [21] there are indications that even if prevalence  
24  
25 estimates are not accurate the associations between the variables studies are  
26  
27 not necessarily biased.  
28  
29  
30  
31  
32  
33

### 34 **Strengths and limitations of the study**

35  
36 A major strength of this study is that the linkage to mortality data was successful  
37  
38 for virtually all individuals of the original sample. Furthermore, the registry data  
39  
40 on mortality in Finland could be considered as quite reliable. All deaths with  
41  
42 suspicion of an external cause and in the age groups studied are investigated by  
43  
44 autopsy.  
45  
46

47  
48 The large sample size secures that the conclusions drawn from the statistical  
49  
50 analyses are reliable and can not have been caused by random effects. To the  
51  
52 best of our knowledge a corresponding study based on as large a sample as in  
53  
54 this study has previously not been carried out.  
55  
56  
57  
58  
59  
60

1  
2  
3 Some inaccuracy concerning the final diagnosis of death is possible. Another  
4  
5 study limitation is that data of socioeconomic status or educational level of non-  
6  
7 respondents was not available and hence adjustments of the statistical analyses  
8  
9 for these variables was not possible.  
10  
11

## 12 13 14 15 **Conclusions**

16  
17  
18  
19  
20 Total mortality was consistently 1.5 – 2 fold and for women in the age group  $\geq$   
21  
22 50 years and for men in the age groups  $\geq$ 40 years significantly higher for the  
23  
24 non-respondents of a nationwide mail survey compared to the respondents. For  
25  
26 women this was mostly due to disease mortality in age group 50-54 years but for  
27  
28 men due to mortality for external causes in age groups 30-34 and 40-44 years.  
29  
30 The most prominent excess mortality was seen for total mortality for both  
31  
32 genders and for mortality due to external causes among men. Selection by  
33  
34 health, especially mental health in men can cause bias in health related  
35  
36 population surveys. However, this applies to prevalence estimates and does not  
37  
38 necessarily jeopardize results from studies on risk and protective factors.  
39  
40  
41  
42  
43  
44  
45  
46  
47  
48

## 49 **REFERENCES**

50  
51 1. Helakorpi S., Prättälä R., Uutela A. Suomalaisen aikuisväestön  
52  
53 terveyskäyttäytyminen ja terveys, kevät 2007. [Health Behaviour and Health  
54  
55



1  
2  
3 among the Finnish Adult Population. Spring 2007] Publications of the National  
4 Public Health Institute. 2008;B 6.  
5  
6  
7

8  
9 2. Kjøller M, Thoning H. Characteristics of non-response in the Danish Health  
10 Interview Surveys, 1987-1994. *Eur J Public Health* 2005;**15**(5):528-35 doi:  
11 10.1093/eurpub/cki023 [Advance Access published online July 28, 2005].  
12  
13  
14

15  
16  
17 3. Cottler LB, Zipp JF, Robins LN, et al. Difficult-to-recruit respondents and their  
18 effect on prevalence estimates in an epidemiologic survey. *Am J Epidemiol*  
19 1987;**125**(2):329-39.  
20  
21  
22  
23

24  
25  
26 4. Jacobsen BK, Thelle DS. The Tromsø Heart Study: responders and non-  
27 responders to a health questionnaire, do they differ? *Scand J Soc Med*  
28 1988;**16**(2):101-4.  
29  
30  
31  
32

33  
34 5. Bakke P, Gulsvik A, Lilleng P, et al. Postal survey on airborne occupational  
35 exposure and respiratory disorders in Norway: causes and consequences of non-  
36 response. *J Epidemiol Community Health* 1990;**44**(4):316-20.  
37  
38  
39  
40

41  
42 6. Jooste PL, Yach D, Steenkamp HJ, et al. Drop-out and newcomer bias in a  
43 community cardiovascular follow-up study. *Int J Epidemiol* 1990;**19**(2):284-9.  
44  
45  
46  
47

48  
49 7. Brussaard JH, Brants HA, Bouman M, et al. The study population: general  
50 characteristics and potential confounding factors. *Eur J Clin Nutr* 1997;**51** Suppl  
51 3:S19-24.  
52  
53  
54  
55

- 1  
2  
3  
4  
5  
6  
7  
8  
9  
10  
11  
12  
13  
14  
15  
16  
17  
18  
19  
20  
21  
22  
23  
24  
25  
26  
27  
28  
29  
30  
31  
32  
33  
34  
35  
36  
37  
38  
39  
40  
41  
42  
43  
44  
45  
46  
47  
48  
49  
50  
51  
52  
53  
54  
55  
56  
57  
58  
59  
60
8. Rönmark E, Lundqvist A, Lundbäck B, et al. Non-responders to a postal questionnaire on respiratory symptoms and diseases. *Eur J Epidemiol* 1999;**15**(3):293-9.
  9. Korkeila K, Suominen S, Ahvenainen J, et al. Non-response and related factors in a nation-wide health survey. *Eur J Epidemiol*. 2001;**17**(11):991-9.
  10. van den Akker M, Buntinx F, Metsemakers JF, et al. Morbidity in responders and non-responders in a register-based population survey. *Fam Pract* 1998;**15**(3):261-3.
  11. Sonne-Holm S, Sørensen TI, Jensen G, et al. Influence of fatness, intelligence, education and sociodemographic factors on response rate in a health survey. *J Epidemiol Community Health* 1989;**43**(4):369-74.
  12. Asch DA, Jedrzejewski MK, Christakis NA. Response rates to mail surveys published in medical journals. *J Clin Epidemiol* 1997;**50**(10):1129-36.
  13. Heilbrun LK, Ross PD, Wasnich RD, et al. Characteristics of respondents and nonrespondents in a prospective study of osteoporosis. *J Clin Epidemiol* 1991;**44**(3):233-9.
  14. Ferrie JE, Kivimäki M, Singh-Manoux A, et al. Non-response to baseline, non-response to follow-up and mortality in the Whitehall II cohort. *Int J Epidemiol* 2009;**38**(3):831-7 doi:10.1093/ije/dyp153 [Advance Access publication 5 March 2009].

- 1  
2  
3 15. Greene N, Greenland S, Olsen J, Aagard Nohr E. Estimating Bias From Loss  
4 to Follow-up in the Danish National Birth Cohort. *Epidemiology* 2011;**22**:815–  
5 822.  
6  
7  
8  
9  
10 16. Foster K, Campbell D, Crum J, et al. Non-response in a population study  
11 after an environmental disaster. *Public Health* 1995;**109**(4):267-73.  
12  
13  
14  
15 17. Janzon L, Hanson BS, Isacsson SO, et al. Factors influencing participation in  
16 health surveys. Results from prospective population study 'Men born in 1914' in  
17 Malmö, Sweden. *J Epidemiol Community Health* 1986;**40**(2):174-7.  
18  
19  
20  
21  
22  
23  
24 18. Dunne MP, Martin NG, Bailey JM, et al. Participation bias in a sexuality  
25 survey: psychological and behavioural characteristics of responders and non-  
26 responders. *Int J Epidemiol* 1997;**26**(4):844-54.  
27  
28  
29  
30  
31  
32 19. Tennant A, Badley EM. A confidence interval approach to investigating non-  
33 response bias and monitoring response to postal questionnaires. *J Epidemiol*  
34 *Community Health* 1991;**45**(1):81-5.  
35  
36  
37  
38  
39  
40 20. Lahaut, V. M. H. C. J., Jansen HAM, van de Mheen D, et al. Estimating non-  
41 response bias in a survey on alcohol consumption: comparison of response  
42 waves. *Alcohol Alcohol* 2003;**38**(2):128-34 [doi:10.1093/alcalc/agg044].  
43  
44  
45  
46  
47  
48  
49 21. Martikainen P, Laaksonen M, Piha K, et al. Does survey non-response bias  
50 the association between occupational social class and health? *Scand J Public*  
51 *Health* 2007;**35**(2):212-5 [doi:10.1080/14034940600996563].  
52  
53  
54  
55  
56  
57  
58  
59  
60

1  
2  
3 22. Koskenvuo M, Kaprio J, Kesaniemi A, et al. Alcohol-related diseases  
4 associated with ischaemic heart disease: a three-year follow-up of middle-aged  
5 male hospital patients. *Alcohol Alcohol* 1986;**21**(3):251-6.  
6  
7

8  
9  
10  
11 23. Boersma F, Eefsting JA, van den Brink W, et al. Characteristics of non-  
12 responders and the impact of non-response on prevalence estimates of  
13 dementia. *Int J Epidemiol* 1997;**26**(5):1055-62.  
14  
15  
16  
17  
18  
19  
20  
21  
22  
23  
24  
25  
26  
27  
28  
29  
30  
31  
32  
33  
34  
35  
36  
37  
38  
39  
40  
41  
42  
43  
44  
45  
46  
47  
48  
49  
50  
51  
52  
53  
54  
55  
56  
57  
58  
59  
60

## Acknowledgements

The study was supported by the Academy of Finland (three different decisions on funding)

The authors do not declare any competing interests

## Data Sharing

At this point we are not willing to share data based on a totally open principle.

However, naturally we are willing to collaborate with other researchers based on plans approved by our research group.

STROBE 2007 (v4) Statement—Checklist of items that should be included in reports of *cohort studies*

| Section/Topic                | Item # | Recommendation                                                                                                                                                                       | Reported on page # |
|------------------------------|--------|--------------------------------------------------------------------------------------------------------------------------------------------------------------------------------------|--------------------|
| Title and abstract           | 1      | (a) Indicate the study's design with a commonly used term in the title or the abstract                                                                                               | 1                  |
|                              |        | (b) Provide in the abstract an informative and balanced summary of what was done and what was found                                                                                  | 4                  |
| <b>Introduction</b>          |        |                                                                                                                                                                                      |                    |
| Background/rationale         | 2      | Explain the scientific background and rationale for the investigation being reported                                                                                                 | 6-7                |
| Objectives                   | 3      | State specific objectives, including any pre-specified hypotheses                                                                                                                    | 7                  |
| <b>Methods</b>               |        |                                                                                                                                                                                      |                    |
| Study design                 | 4      | Present key elements of study design early in the paper                                                                                                                              | 8-9                |
| Setting                      | 5      | Describe the setting, locations, and relevant dates, including periods of recruitment, exposure, follow-up, and data collection                                                      | 8-9                |
| Participants                 | 6      | (a) Give the eligibility criteria, and the sources and methods of selection of participants. Describe methods of follow-up                                                           | 8-9                |
|                              |        | (b) For matched studies, give matching criteria and number of exposed and unexposed                                                                                                  |                    |
| Variables                    | 7      | Clearly define all outcomes, exposures, predictors, potential confounders, and effect modifiers. Give diagnostic criteria, if applicable                                             | 8-9                |
| Data sources/<br>measurement | 8*     | For each variable of interest, give sources of data and details of methods of assessment (measurement). Describe comparability of assessment methods if there is more than one group | 8-9                |
| Bias                         | 9      | Describe any efforts to address potential sources of bias                                                                                                                            | 8-9                |
| Study size                   | 10     | Explain how the study size was arrived at                                                                                                                                            | 9                  |
| Quantitative variables       | 11     | Explain how quantitative variables were handled in the analyses. If applicable, describe which groupings were chosen and why                                                         | 9-10               |
| Statistical methods          | 12     | (a) Describe all statistical methods, including those used to control for confounding                                                                                                | 9-10               |
|                              |        | (b) Describe any methods used to examine subgroups and interactions                                                                                                                  | 9-10               |
|                              |        | (c) Explain how missing data were addressed                                                                                                                                          | 9                  |
|                              |        | (d) If applicable, explain how loss to follow-up was addressed                                                                                                                       | 8-9                |
|                              |        | (e) Describe any sensitivity analyses                                                                                                                                                |                    |
| <b>Results</b>               |        |                                                                                                                                                                                      |                    |

|                          |     |                                                                                                                                                                                                                |                     |
|--------------------------|-----|----------------------------------------------------------------------------------------------------------------------------------------------------------------------------------------------------------------|---------------------|
| Participants             | 13* | (a) Report numbers of individuals at each stage of study—e.g. numbers potentially eligible, examined for eligibility, confirmed eligible, included in the study, completing follow-up, and analysed            | 8-9                 |
|                          |     | (b) Give reasons for non-participation at each stage                                                                                                                                                           | 8-9                 |
|                          |     | (c) Consider use of a flow diagram                                                                                                                                                                             |                     |
| Descriptive data         | 14* | (a) Give characteristics of study participants (e.g. demographic, clinical, social) and information on exposures and potential confounders                                                                     | Table 1, 11-12      |
|                          |     | (b) Indicate number of participants with missing data for each variable of interest                                                                                                                            | Table 1, 11-12      |
|                          |     | (c) Summarise follow-up time (e.g., average and total amount)                                                                                                                                                  | 8-9, Table 1, 11-12 |
| Outcome data             | 15* | Report numbers of outcome events or summary measures over time                                                                                                                                                 | Table 1, 11-12      |
| Main results             | 16  | (a) Give unadjusted estimates and, if applicable, confounder-adjusted estimates and their precision (e.g., 95% confidence interval). Make clear which confounders were adjusted for and why they were included | Table 2-4, 13-14    |
|                          |     | (b) Report category boundaries when continuous variables were categorized                                                                                                                                      | 8-9                 |
|                          |     | (c) If relevant, consider translating estimates of relative risk into absolute risk for a meaningful time period                                                                                               |                     |
| Other analyses           | 17  | Report other analyses done—e.g. analyses of subgroups and interactions, and sensitivity analyses                                                                                                               |                     |
| <b>Discussion</b>        |     |                                                                                                                                                                                                                |                     |
| Key results              | 18  | Summarise key results with reference to study objectives                                                                                                                                                       | 14                  |
| <b>Limitations</b>       |     |                                                                                                                                                                                                                |                     |
| Interpretation           | 20  | Give a cautious overall interpretation of results considering objectives, limitations, multiplicity of analyses, results from similar studies, and other relevant evidence                                     | 15-18               |
| Generalisability         | 21  | Discuss the generalisability (external validity) of the study results                                                                                                                                          | 15-18               |
| <b>Other information</b> |     |                                                                                                                                                                                                                |                     |
| Funding                  | 22  | Give the source of funding and the role of the funders for the present study and, if applicable, for the original study on which the present article is based                                                  | 22                  |

\*Give information separately for cases and controls in case-control studies and, if applicable, for exposed and unexposed groups in cohort and cross-sectional studies.

**Note:** An Explanation and Elaboration article discusses each checklist item and gives methodological background and published examples of transparent reporting. The STROBE checklist is best used in conjunction with this article (freely available on the Web sites of PLoS Medicine at <http://www.plosmedicine.org/>, Annals of Internal Medicine at <http://www.annals.org/>, and Epidemiology at <http://www.epidem.com/>). Information on the STROBE Initiative is available at [www.strobe-statement.org](http://www.strobe-statement.org).
